# Supplementary material for: The Role of the Bridge in Single-Ion Magnet Behaviour: Reinvestigation of Cobalt(II) Succinate and Fumarate Coordination Polymers with Nicotinamide
Source: MDPI journal article supplement (doi:10.3390/inorganics10090128), 2022-08-30
Supplement: s1 [file s1]

# **The Role of Bridge for Single-Ion Magnet Behaviour: Reinvestigation of Cobalt(II) Succinate and Fumarate Coordination Polymers with Nicotinamide**

**Marek Brezovan<sup>1</sup>, Jana Juráková<sup>2</sup>, Ján Moncol<sup>1</sup>, Ľubor Dlháň<sup>1</sup>, Maria Korabik<sup>3</sup>, Ivan Šalitroš<sup>1,2,4</sup>, Ján Pavlík<sup>1,\*</sup>, Peter Segľa<sup>1</sup>**

*<sup>1</sup>Faculty of Chemical and Food Technology, Slovak University of Technology,  
Radlinského 9, 812 37, Bratislava, Slovakia  
jan.pavlik@stuba.sk*

*<sup>2</sup>Central European Institute of Technology, Brno University of Technology,  
Purkyňova 123, 61200 Brno, Czech Republic*

*<sup>3</sup>Faculty of Chemistry, University of Wrocław,  
F. Joliot -Curie 14, 50-383 Wrocław,  
Poland*

*<sup>4</sup>Faculty of Science, Palacký University,  
17. listopadu 12, 771 46 Olomouc, Czech Republic*

## **Contents**

|                                      |    |
|--------------------------------------|----|
| S1 Crystallographic Characterization | 2  |
| S2 Spectroscopic Characterization    | 13 |
| S3 Computational Characterization    | 20 |
| S4 Dynamic Magnetic Properties       | 21 |

## S1 Crystallographic Characterization

**Table S1** Crystallographic data for compounds **I** and **II**

|                                                                | <b>I</b>                                                         | <b>II</b>                                                       |
|----------------------------------------------------------------|------------------------------------------------------------------|-----------------------------------------------------------------|
| Chemical formula                                               | C <sub>16</sub> H <sub>24</sub> CoN <sub>4</sub> O <sub>10</sub> | C <sub>16</sub> H <sub>18</sub> CoN <sub>4</sub> O <sub>8</sub> |
| $M_r$                                                          | 491.323                                                          | 453.277                                                         |
| Crystal system                                                 | Triclinic                                                        | Triclinic                                                       |
| Space group                                                    | $P\bar{1}$                                                       | $P\bar{1}$                                                      |
| $T / \text{K}$                                                 | 100(1)                                                           | 100(1)                                                          |
| $a / \text{\AA}$                                               | 7.4478(2)                                                        | 7.2175(2)                                                       |
| $b / \text{\AA}$                                               | 7.8226(3)                                                        | 7.5419(3)                                                       |
| $c / \text{\AA}$                                               | 9.7729(3)                                                        | 9.0156(3)                                                       |
| $\alpha / ^\circ$                                              | 66.853(3)                                                        | 109.677(3)                                                      |
| $\beta / ^\circ$                                               | 69.244(3)                                                        | 103.138(3)                                                      |
| $\gamma / ^\circ$                                              | 76.561(3)                                                        | 97.449(3)                                                       |
| $V / \text{\AA}^3$                                             | 486.69(3)                                                        | 438.48(3)                                                       |
| $Z$                                                            | 1                                                                | 1                                                               |
| $\lambda$ (Cu- $K\alpha$ ) / $\text{\AA}$                      | 1.54186                                                          | 1.54186                                                         |
| $\mu / \text{mm}^{-1}$                                         | 7.52                                                             | 8.205                                                           |
| Crystal size / mm                                              | $0.28 \times 0.22 \times 0.15$                                   | $0.15 \times 0.09 \times 0.06$                                  |
| $\rho_{\text{calc}} / \text{g.cm}^{-3}$                        | 1.676                                                            | 1.717                                                           |
| $S$                                                            | 1.060                                                            | 1.145                                                           |
| $R_1 [I > 2\sigma(I)]$                                         | 0.0214                                                           | 0.0196                                                          |
| $wR_2$ [all data]                                              | 0.0506                                                           | 0.0448                                                          |
| $\Delta_{\text{max}}, \Delta_{\text{min}} / \text{e \AA}^{-3}$ | 0.25, -0.29                                                      | 0.17, -0.32                                                     |
| CCDC                                                           | 1976280                                                          | 2105647                                                         |

**Table S2** Selected geometric parameters (Å) for **I** and **II**

| I                    |            | II                    |            |
|----------------------|------------|-----------------------|------------|
| Co1–O1               | 2.0931(9)  | Co1–O1                | 2.0683(8)  |
| Co1–O1 <sup>i</sup>  | 2.0931(9)  | Co1–O1 <sup>ii</sup>  | 2.0683(8)  |
| Co1–N1               | 2.1672(12) | Co1–N1                | 2.1689(10) |
| Co1–N1 <sup>i</sup>  | 2.1672(12) | Co1–N1 <sup>ii</sup>  | 2.1689(10) |
| Co1–O1W              | 2.1090(10) | Co1–O1W               | 2.0924(9)  |
| Co1–O1W <sup>i</sup> | 2.1090(10) | Co1–O1W <sup>ii</sup> | 2.0924(9)  |

Symmetry codes: (i) 1–x, 1–y, 2–z; (ii) 1–x, 1–y, –z

**Table S3** Symmetry measure parameters obtained from SHAPE structural analysis and distortion parameters  $\Sigma$  calculated for coordination polyhedra **I** and **II**: hexagon ( $D_{6h}$ ); pentagonal pyramid ( $C_{5v}$ ); octahedron ( $O_h$ ); trigonal prism ( $D_{3h}$ ); Johnson pentagonal pyramid ( $C_{5v}$ );  $\Sigma = \sum_1^{12} |\varphi_i - 90|$ ; where  $\varphi_i$  presents *cis* angle in hexacoordinated polyhedron

|                   | $S(D_{6h})$ | $S(C_{5v})$ | $S(O_h)$     | $S(D_{3h})$ | $S(C_{5v})$ | $\Sigma / ^\circ$ |
|-------------------|-------------|-------------|--------------|-------------|-------------|-------------------|
| Complex <b>I</b>  | 30.489      | 28.886      | <b>0.198</b> | 16.142      | 32.102      | 30                |
| Complex <b>II</b> | 29.212      | 28.243      | <b>0.306</b> | 16.069      | 31.322      | 43                |

**Table S4** Parameters of H-bonds

|                                       | $d(\text{H}\cdots\text{A})/\text{\AA}$ | $d(\text{D}\cdots\text{A})/\text{\AA}$ | $\text{D}-\text{H}\cdots\text{A}/^\circ$ |
|---------------------------------------|----------------------------------------|----------------------------------------|------------------------------------------|
| <b>I at 100 K (HAR model)</b>         |                                        |                                        |                                          |
| O1W-H1WA $\cdots$ O2W (1-x, 2-y, 2-z) | 1.80(2)                                | 2.758(1)                               | 175(2)                                   |
| O1W-H1WB $\cdots$ O2 (1+x, y, z)      | 2.03(2)                                | 2.857(1)                               | 152(2)                                   |
| O2W-H2WA $\cdots$ O1                  | 1.84(3)                                | 2.794(1)                               | 173(2)                                   |
| O2W-H2WB $\cdots$ O3 (x, 1+y, z)      | 1.90(2)                                | 2.834(1)                               | 170(2)                                   |
| N2-H2A $\cdots$ O3 (2-x, -y, 1-z)     | 1.97(2)                                | 2.943(1)                               | 160(2)                                   |
| N2-H2B $\cdots$ O2 (1+x, y, -1+z)     | 2.10(2)                                | 3.046(1)                               | 169(2)                                   |
| C3-H3 $\cdots$ O2 (1+x, y, -1+z)      | 2.40(2)                                | 3.357(1)                               | 150(2)                                   |
| <b>II at 100 K (HAR model)</b>        |                                        |                                        |                                          |
| O1W-H1WA $\cdots$ O3 (x, -1+y, z)     | 1.90(2)                                | 2.822(1)                               | 166(2)                                   |
| O1W-H1WB $\cdots$ O2 (1+x, y, z)      | 1.82(2)                                | 2.758(1)                               | 167(2)                                   |
| N2-H2A $\cdots$ O3 (2-x, 3-y, 1-z)    | 1.95(2)                                | 2.972(1)                               | 171(2)                                   |
| N2-H2B $\cdots$ O2 (1+x, 1+y, 1+z)    | 1.92(2)                                | 2.901(1)                               | 170(2)                                   |
| C3-H3 $\cdots$ O2 (1+x, 1+y, 1+z)     | 2.19(2)                                | 3.232(1)                               | 161(2)                                   |

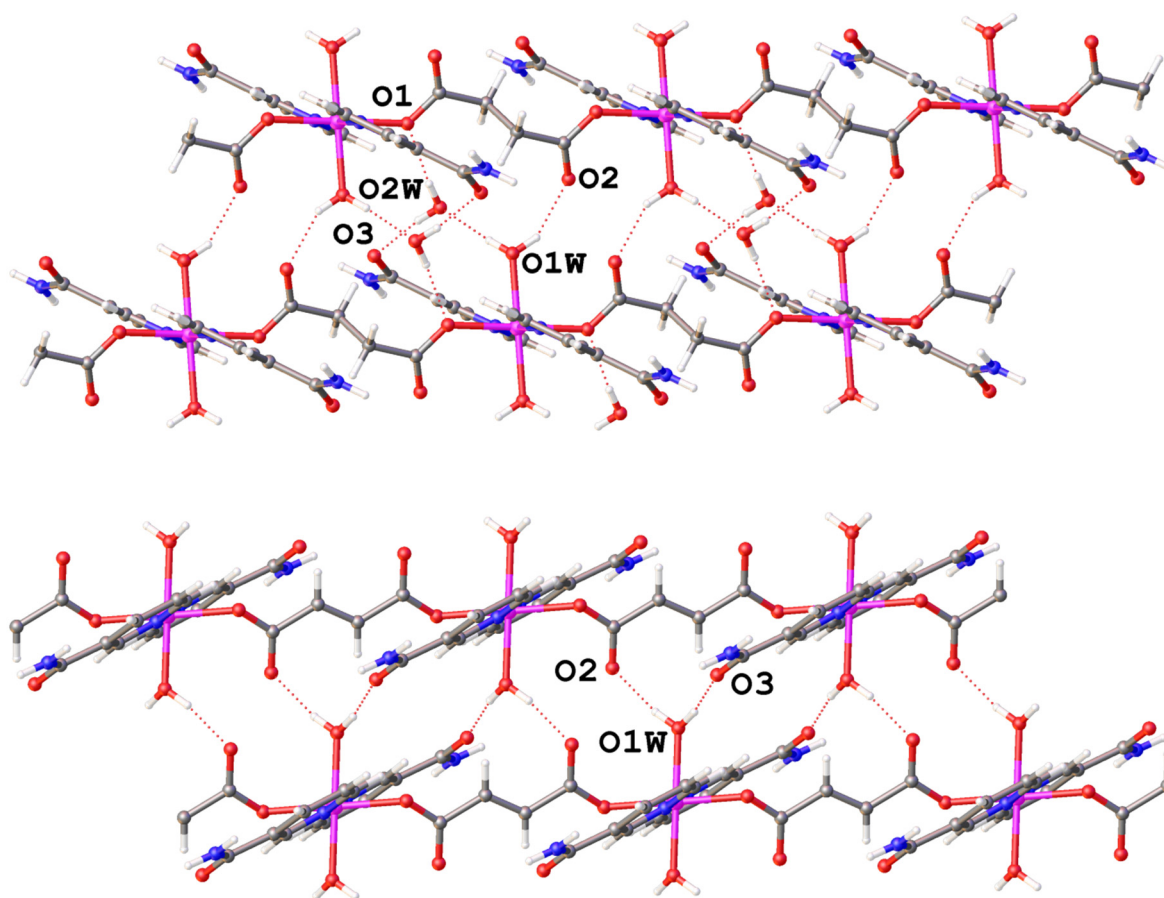

**Figure S1** Comparison of O-H...O hydrogen bonds in crystal structure of the complexes **I** (top) and **II** (bottom).

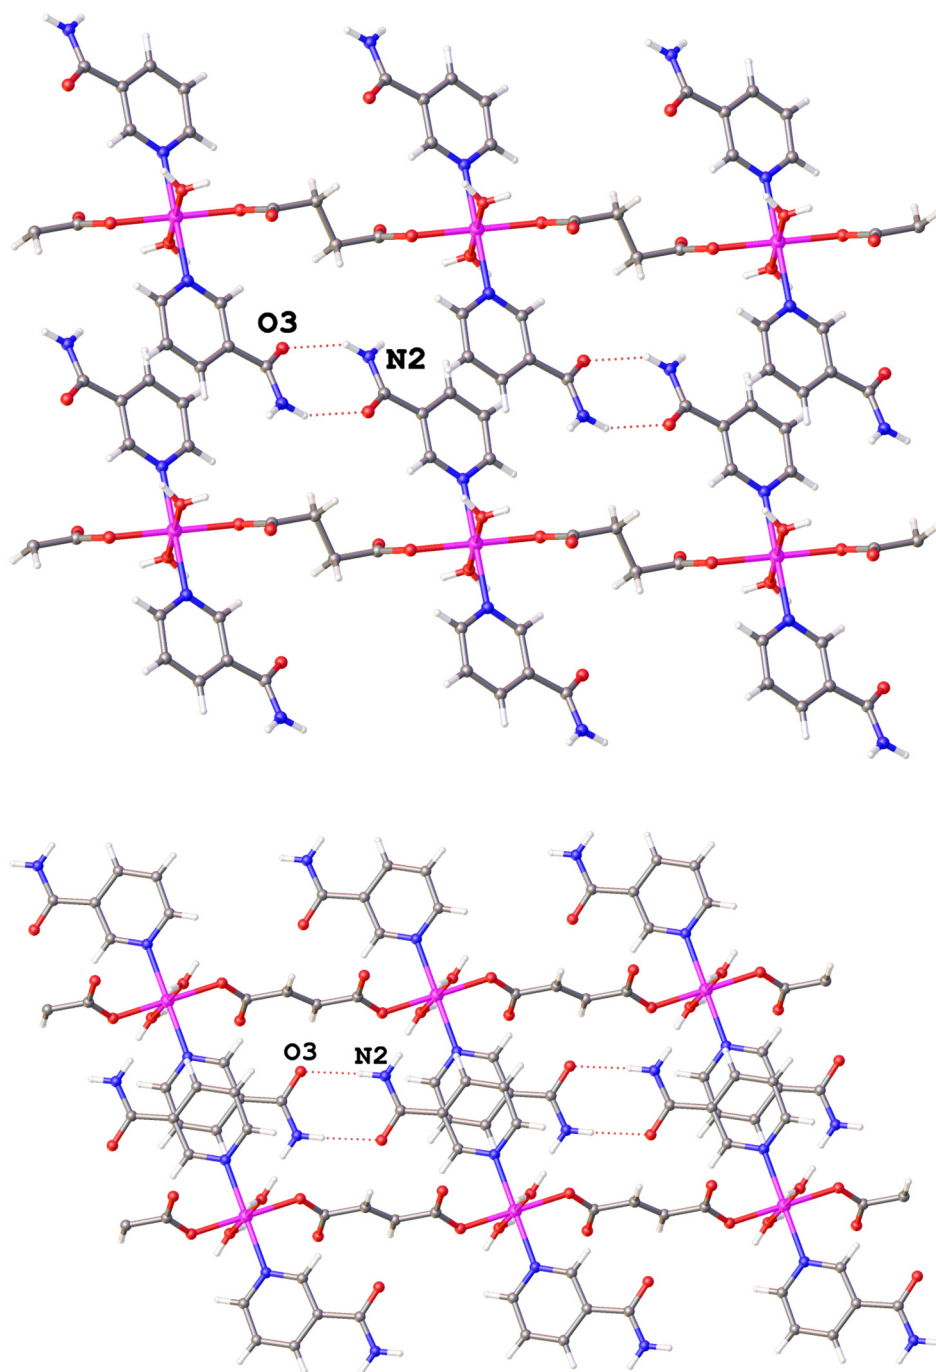

**Figure S2** Comparison of face-to-face supramolecular synthons through N-H...O hydrogen bonds of carboxamide groups of two nicotinamide ligands in crystal structure of the complexes **I** (top) and **II** (bottom).

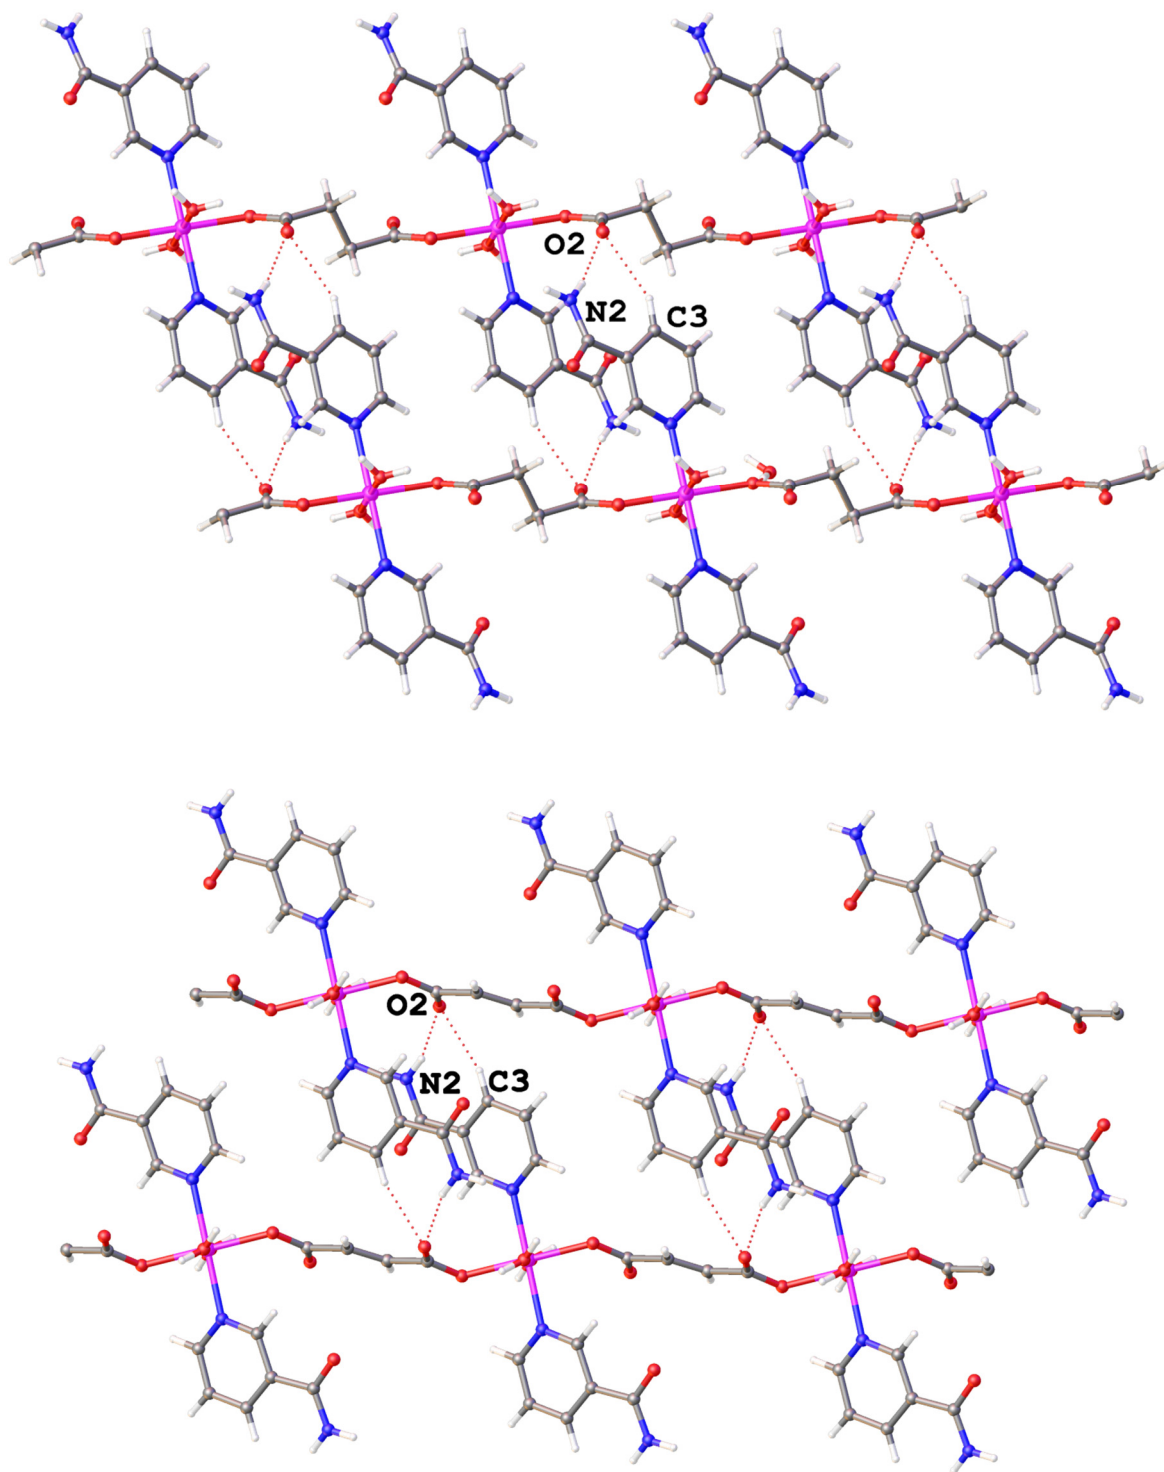

**Figure S3** Comparison of N-H $\cdots$ O and C-H $\cdots$ O hydrogen bonds in crystal structure of the complex **I** (top) and the **II** (bottom)

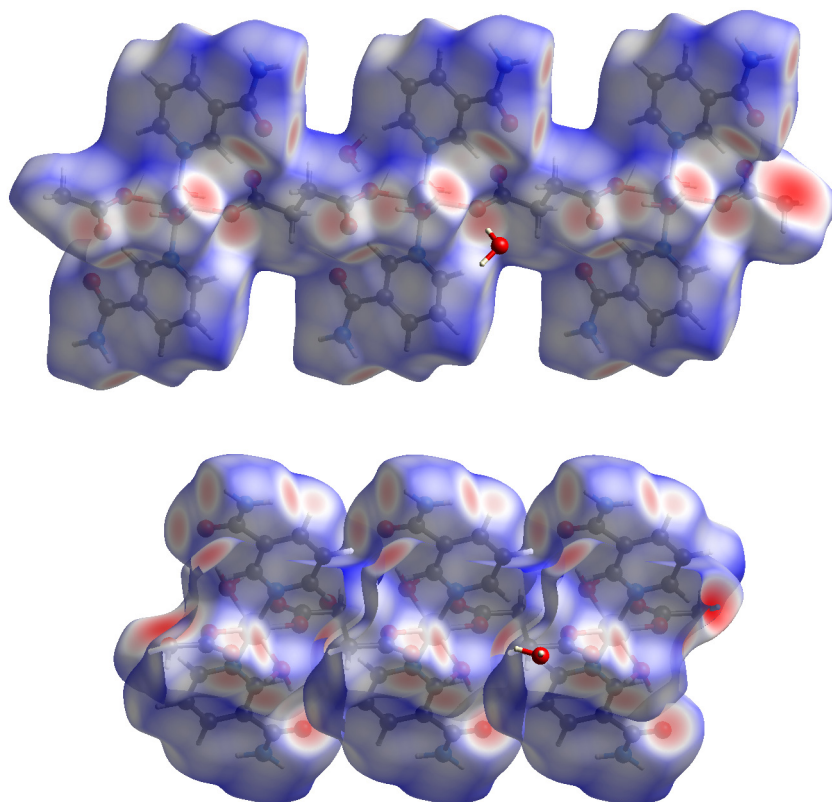

**Figure S4** View of the three-dimensional Hirshfeld surface of **I** plotted over  $d_{\text{norm}}$  in the range  $-1.2390 + 1.1257$  a.u.

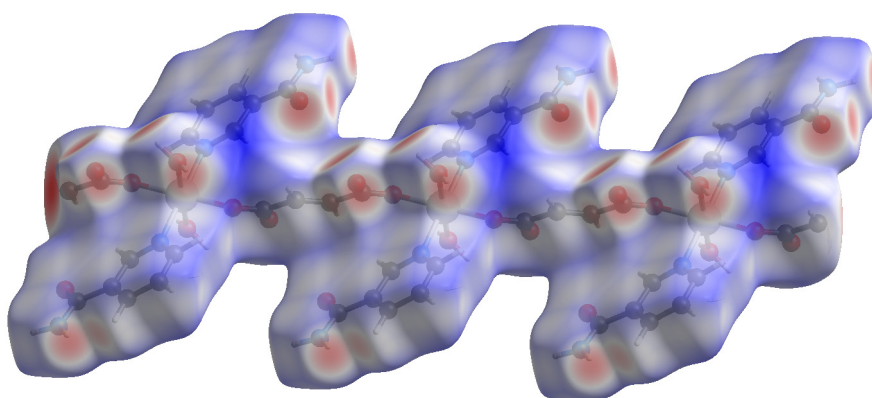

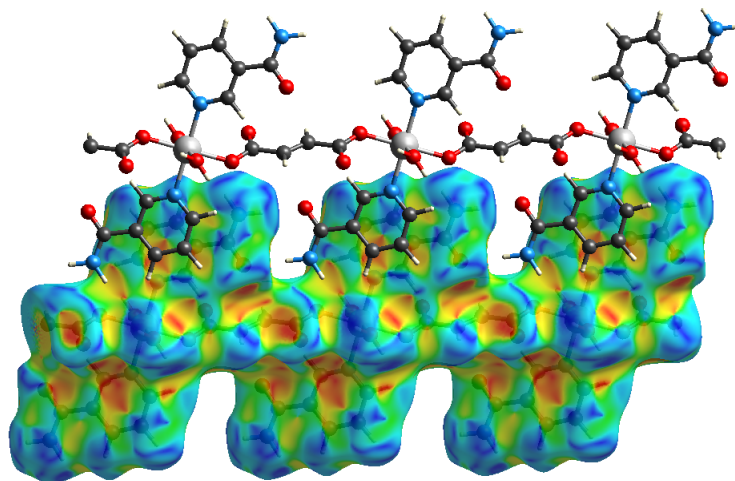

**Figure S5** View of the three-dimensional Hirshfeld surface of **II** plotted over  $d_{\text{norm}}$  in the range  $-1.2217 + 1.4341$  a.u.

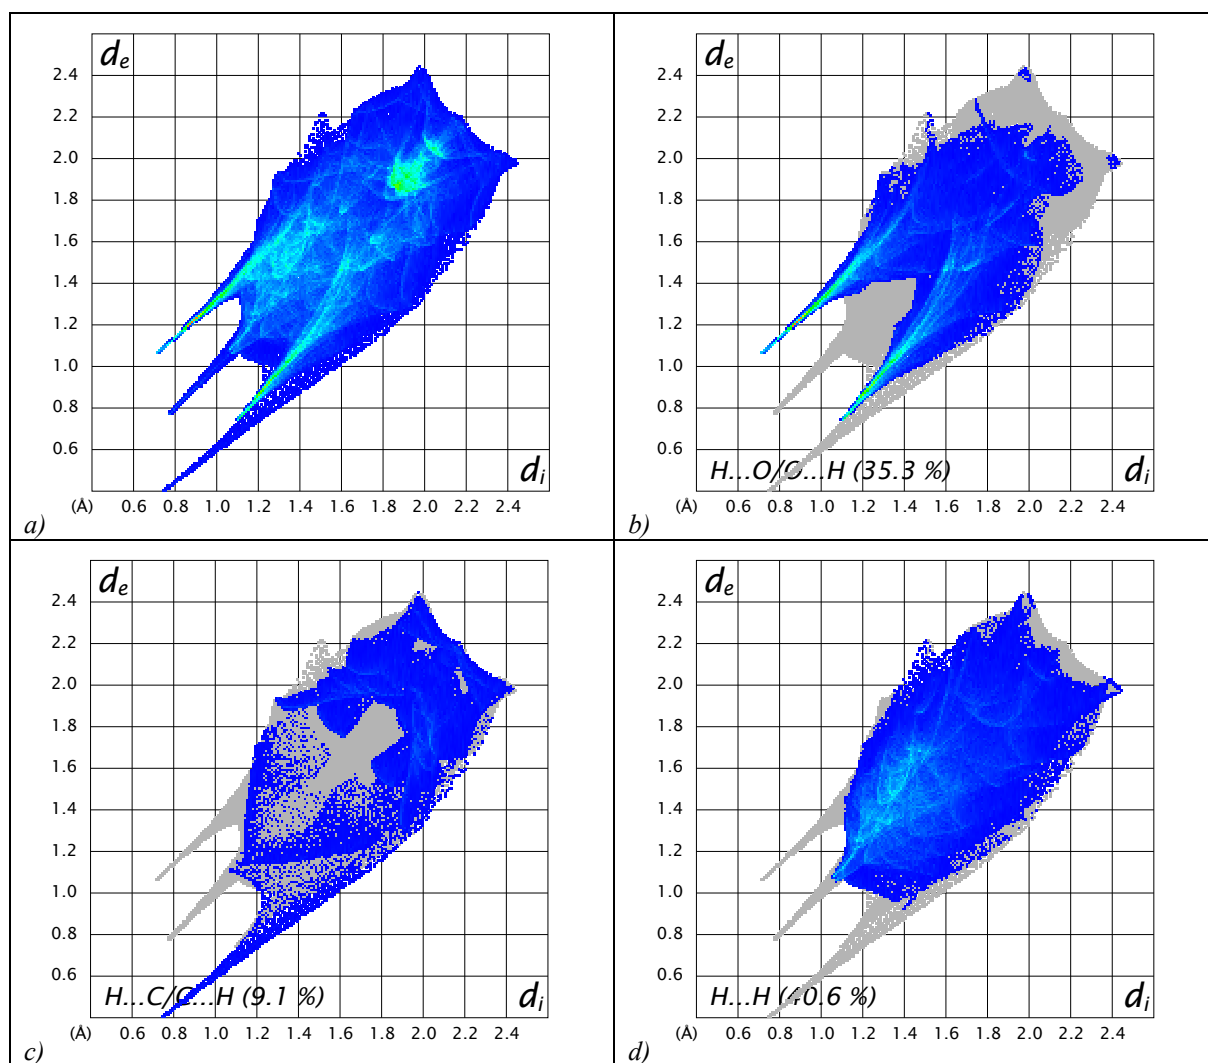

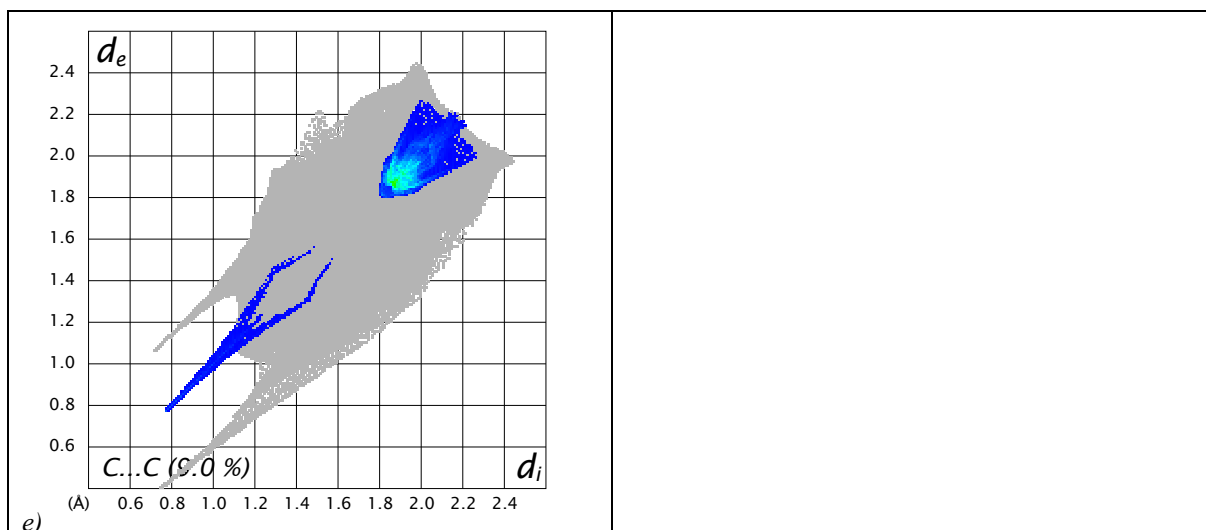

**Figure S6** The full two-dimensional fingerprint plots of **I**, showing (a) all interactions, and delineated into (b)  $\text{H}\cdots\text{O}/\text{O}\cdots\text{H}$ , (c)  $\text{H}\cdots\text{Cl}/\text{Cl}\cdots\text{H}$ , (d)  $\text{H}\cdots\text{C}/\text{C}\cdots\text{H}$ , (e)  $\text{O}\cdots\text{O}$ , and (f)  $\text{H}\cdots\text{H}$  interactions. The  $d_i$  and  $d_e$  values are the closest internal and external distances from given on the Hirshfeld surface contacts.

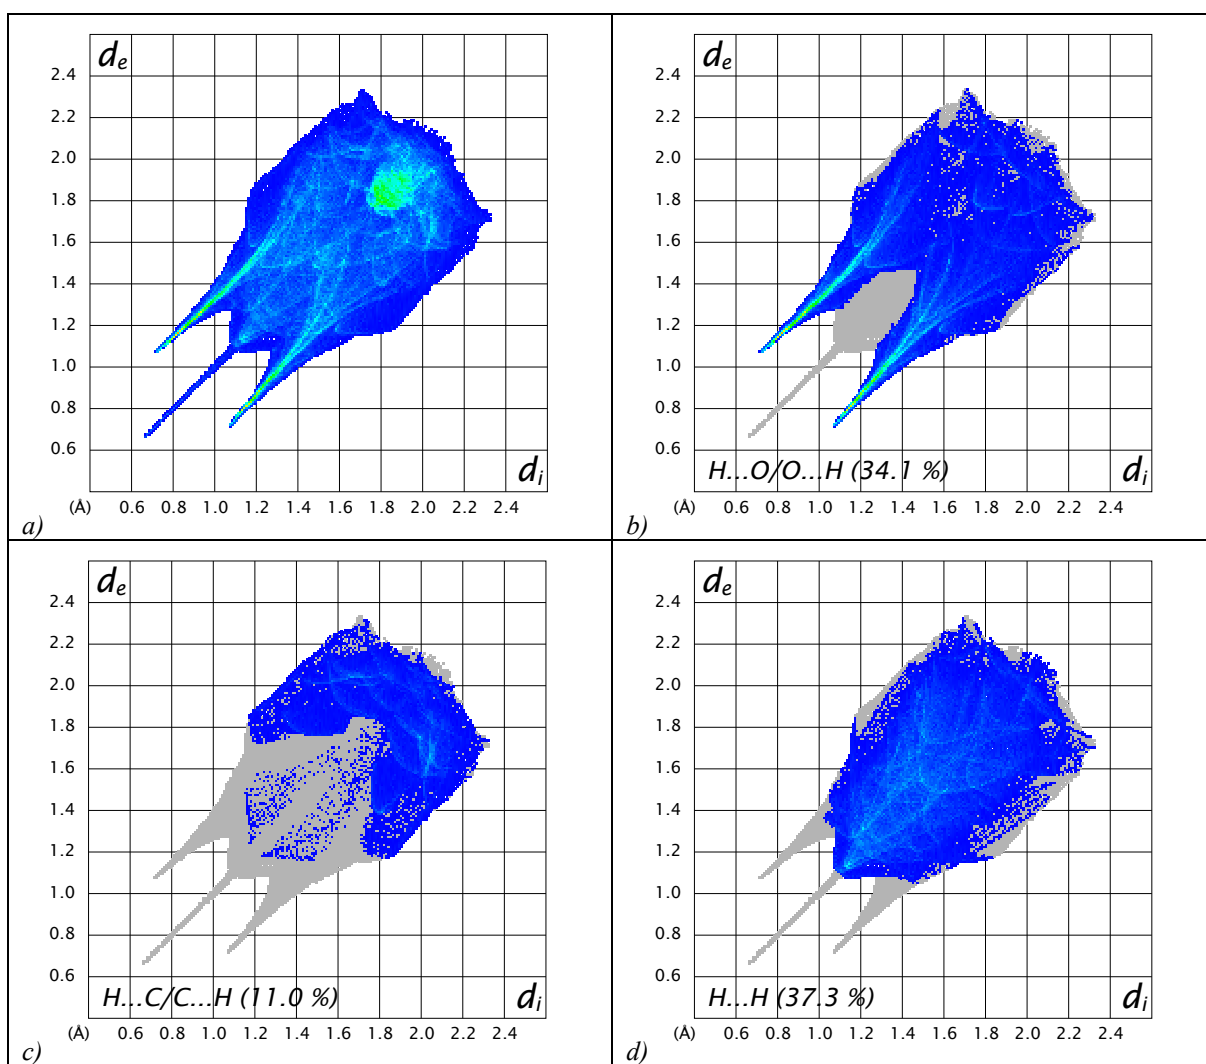

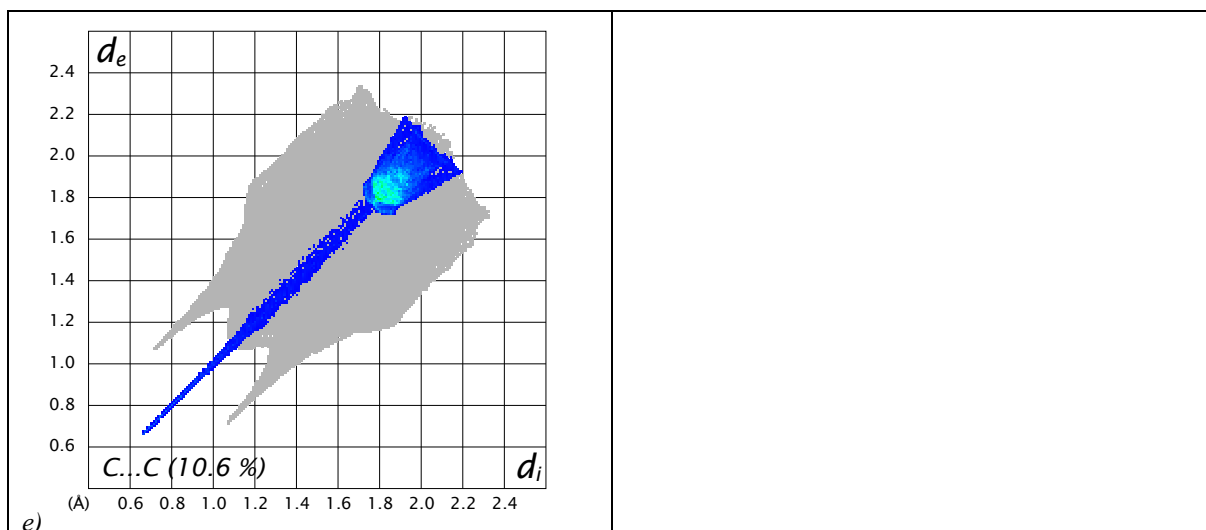

**Figure S7** The full two-dimensional fingerprint plots of **II**, showing (a) all interactions, and delineated into (b)  $\text{H}\cdots\text{O}/\text{O}\cdots\text{H}$ , (c)  $\text{H}\cdots\text{Cl}/\text{Cl}\cdots\text{H}$ , (d)  $\text{H}\cdots\text{C}/\text{C}\cdots\text{H}$ , (e)  $\text{O}\cdots\text{O}$ , and (f)  $\text{H}\cdots\text{H}$  interactions. The  $d_i$  and  $d_e$  values are the closest internal and external distances from given on the Hirshfeld surface contacts.

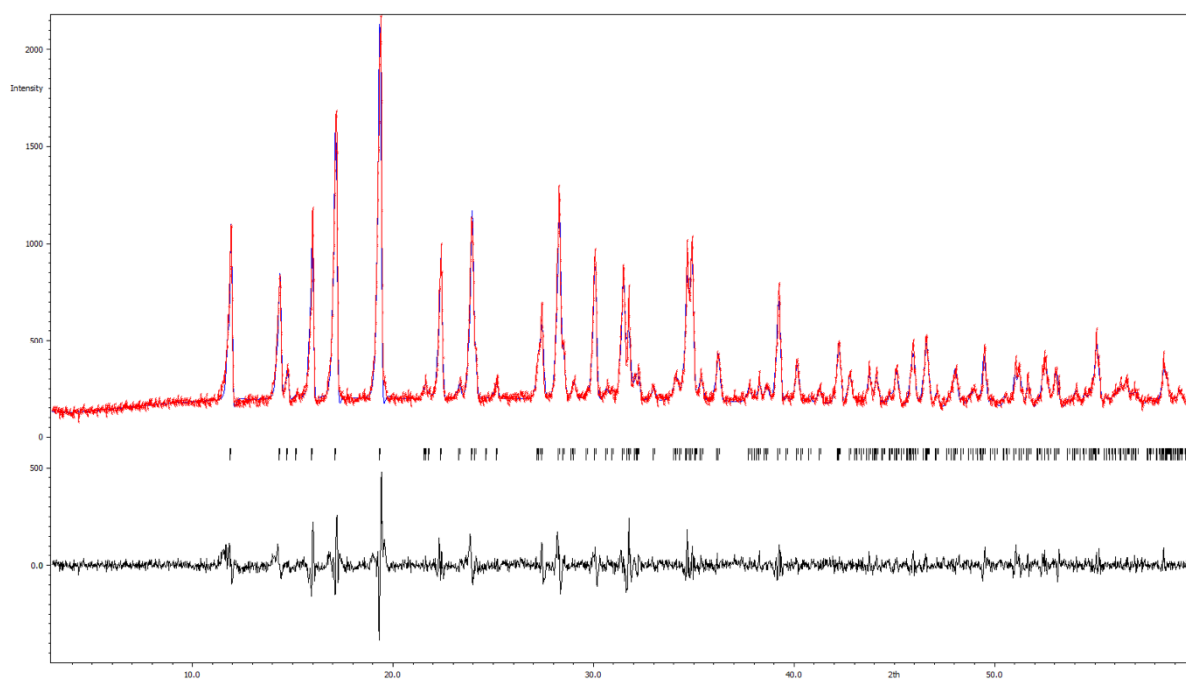

**Figure S8** Observed (crosses), calculated (solid line) diffraction patterns and difference plot (below) for Le Bail analysis of **I**.

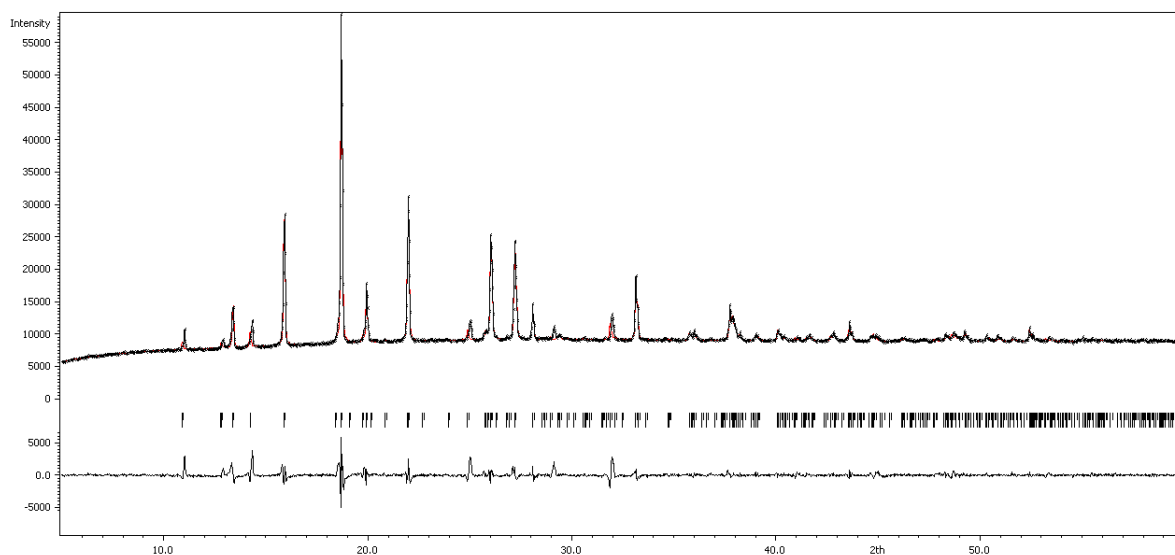

**Figure S9** Observed (crosses), calculated (solid line) diffraction patterns and difference plot (below) for Le Bail analysis of **II**.

## S2 Spectroscopic Characterization

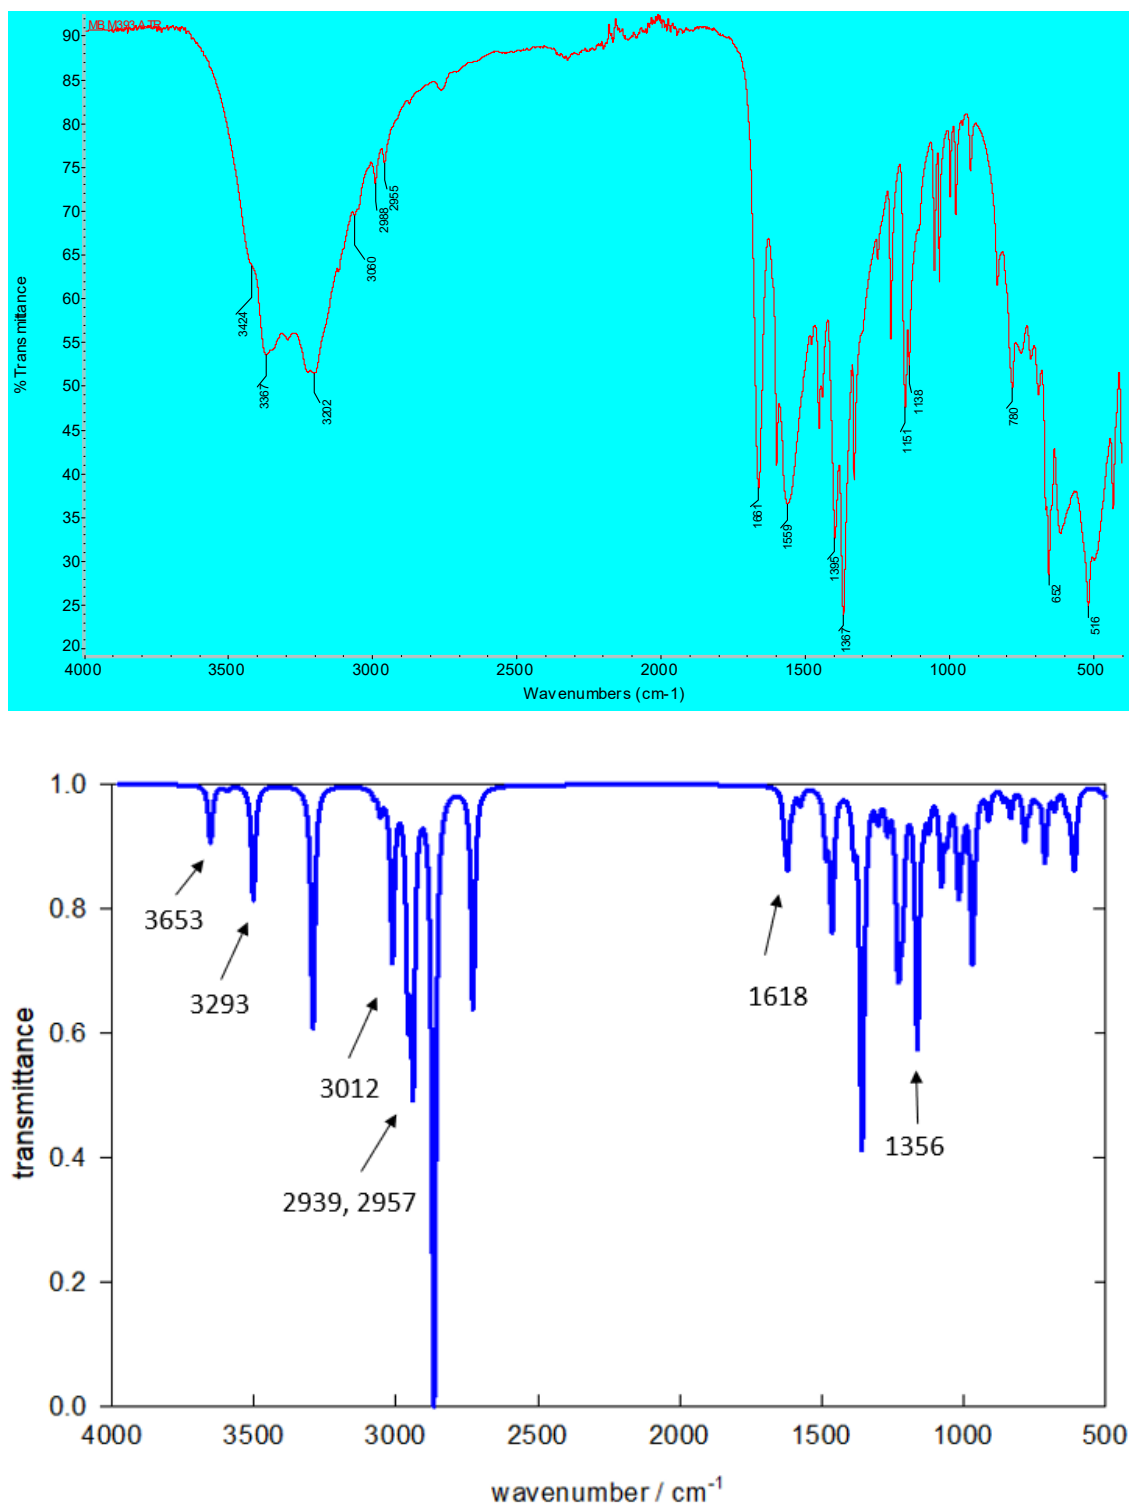

**Figure S10** IR spectra of complex **I** prepared from nia, top: experiment, bottom: calculation.

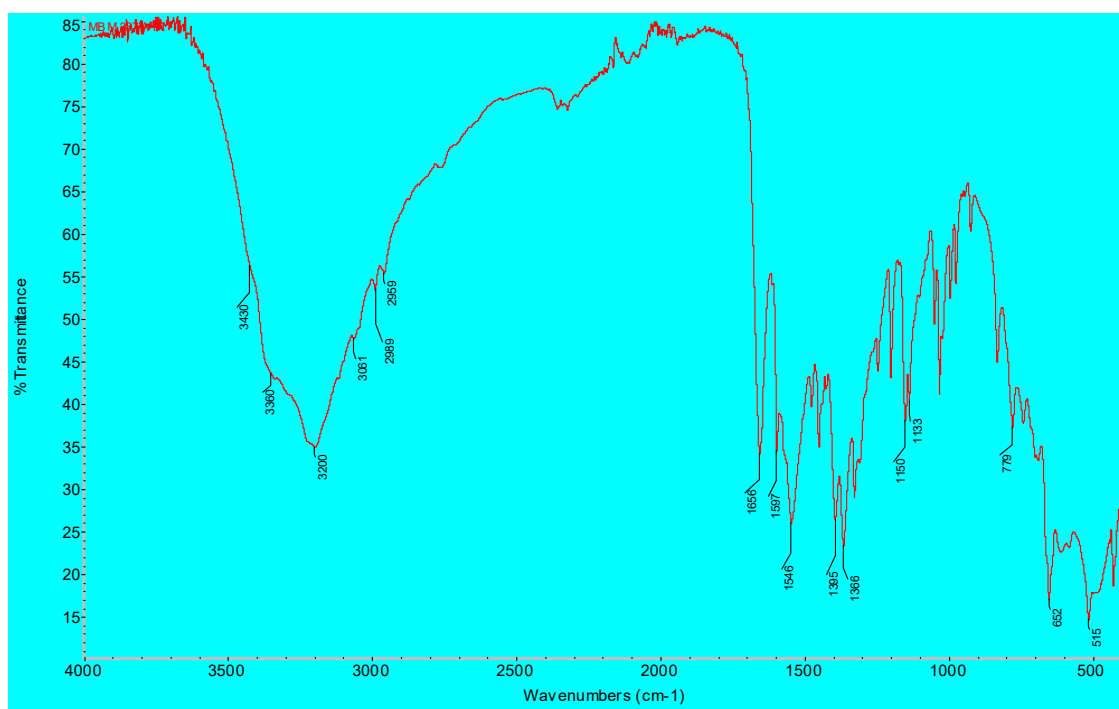

**Figure S11** IR spectra of complex **I** prepared from hmnia.

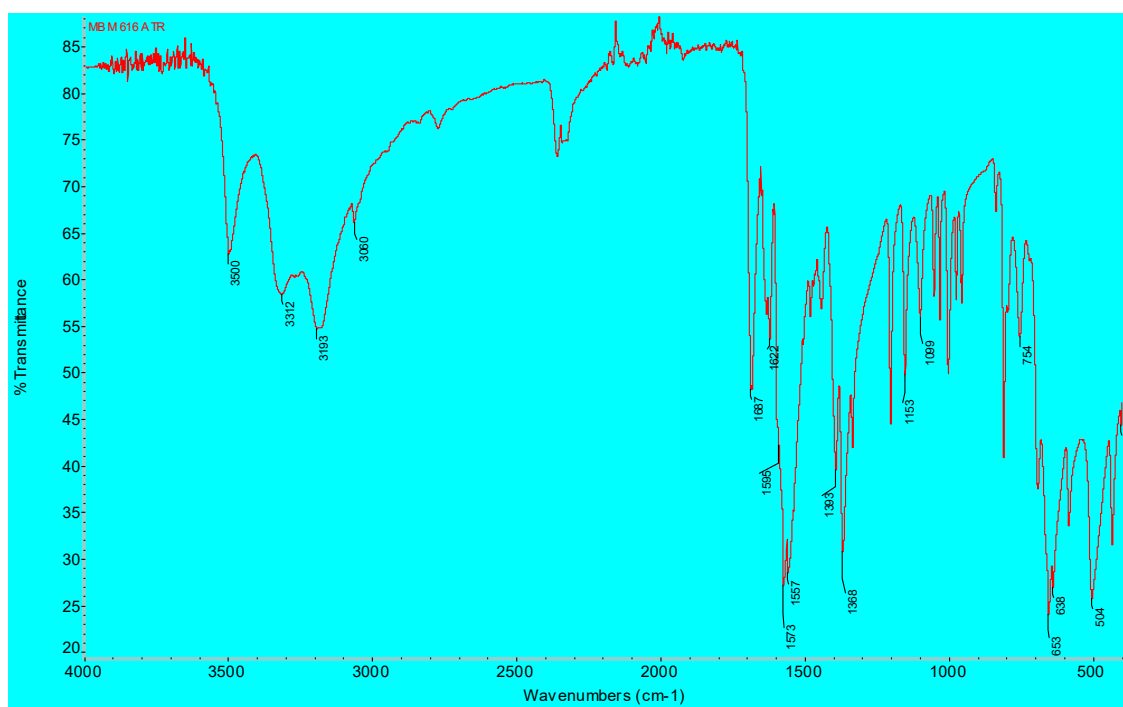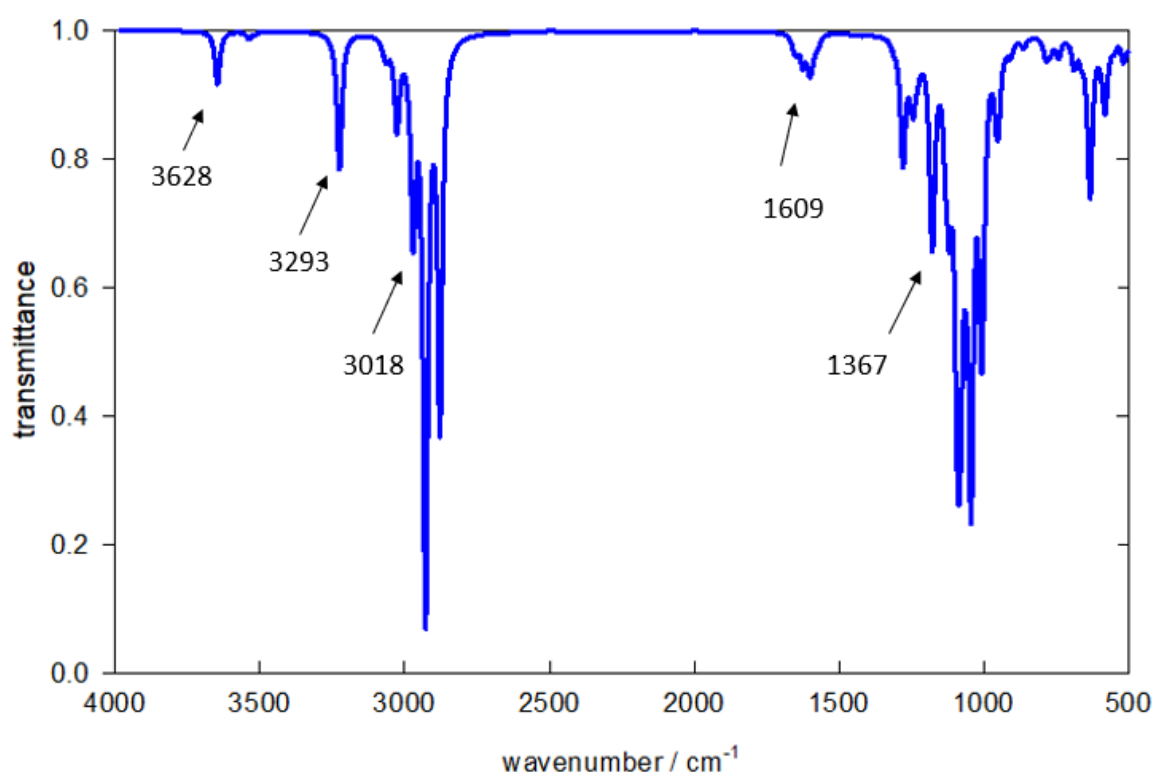

Figure S12 IR spectra of complex II, top: experiment, bottom: calculation.

**Table S5:** Characteristics bands in infrared spectra of complexes.

| Compound                              | Water and amide group (cm <sup>-1</sup> ) |                                |                               |                  |         |          | Carboxyl group (cm <sup>-1</sup> ) |                                |            |
|---------------------------------------|-------------------------------------------|--------------------------------|-------------------------------|------------------|---------|----------|------------------------------------|--------------------------------|------------|
|                                       | $\nu(\text{OH})$                          | $\nu_{\text{as}}(\text{NH}_2)$ | $\nu_{\text{s}}(\text{NH}_2)$ | Amid I           | Amid II | Amid III | $\nu_{\text{as}}(\text{COO}^-)$    | $\nu_{\text{s}}(\text{COO}^-)$ | $\Delta^b$ |
| nia                                   | —                                         | 3351s,br                       | 3140s,br                      | 1673vs<br>1698sh | 1618s   | 1392vs   | —                                  | —                              | —          |
| Na <sub>2</sub> suc·6H <sub>2</sub> O | 3250-3550s,br                             | —                              | —                             | —                | —       | —        | 1539vs,br                          | 1398vs,br                      | 141        |
| Na <sub>2</sub> fum                   | —                                         | —                              | —                             | —                | —       | —        | 1569vs,br                          | 1381vs,br                      | 188        |
| complex I prepared from nia           | 3424sh                                    | 3367s,br                       | 3202s,br                      | 1661vs           | 1625sh  | 1395vs   | 1559vs,br                          | 1367vs,br                      | 192        |
| complex I prepared from hmnia         | 3430sh                                    | 3360s,br                       | 3200vs,br                     | 1656vs           | 1627sh  | 1395vs   | 1546vs,br                          | 1366vs,br                      | 180        |
| complex II                            | 3500s                                     | 3312s,br                       | 3193s,br                      | 1687s            | 1622    | 1393s    | 1573vs<br>1557vs                   | 1368vs                         | 201        |

<sup>a</sup> vs, very strong; s, strong; sh, shoulder; br, broad; <sup>b</sup>  $\Delta = \nu_{\text{as}}(\text{COO}^-) - \nu_{\text{s}}(\text{COO}^-)$

**Table S6:** Comparison of the observed and calculated vibrational mode frequencies for the complexes I and II.

| Assignment                      | Experimental IR (cm <sup>-1</sup> ) |            | B3LYP/def2-TZVP (cm <sup>-1</sup> ) |            |
|---------------------------------|-------------------------------------|------------|-------------------------------------|------------|
|                                 | Complex I                           | Complex II | Complex I                           | Complex II |
| $\nu_{\text{as}}(\text{OH})$    | 3424                                | 3500       | 3653                                | 3628       |
| $\nu_{\text{as}}(\text{NH}_2)$  | 3367                                | 3312       | -                                   | -          |
| $\nu_{\text{s}}(\text{NH}_2)$   | 3202                                | 3193       | 3293                                | 3293       |
| $\nu_{\text{ar}}(\text{C-H})$   | 3060                                | 3060       | 3012                                | 3018       |
| $\nu_{\text{as}}(\text{CH}_2)$  | 2988                                | -          | 2957                                | -          |
| $\nu_{\text{s}}(\text{CH}_2)$   | 2955                                | -          | 2939                                | -          |
| Amid I                          | 1661                                | 1687       | -                                   | -          |
| Amid II                         | 1625                                | 1622       | 1618                                | 1609       |
| Amid III                        | 1395                                | 1393       | 1356                                | 1367       |
| $\nu_{\text{as}}(\text{COO}^-)$ | 1559                                | 1557       | -                                   | -          |
| $\nu_{\text{s}}(\text{COO}^-)$  | 1367                                | 1368       | -                                   | -          |

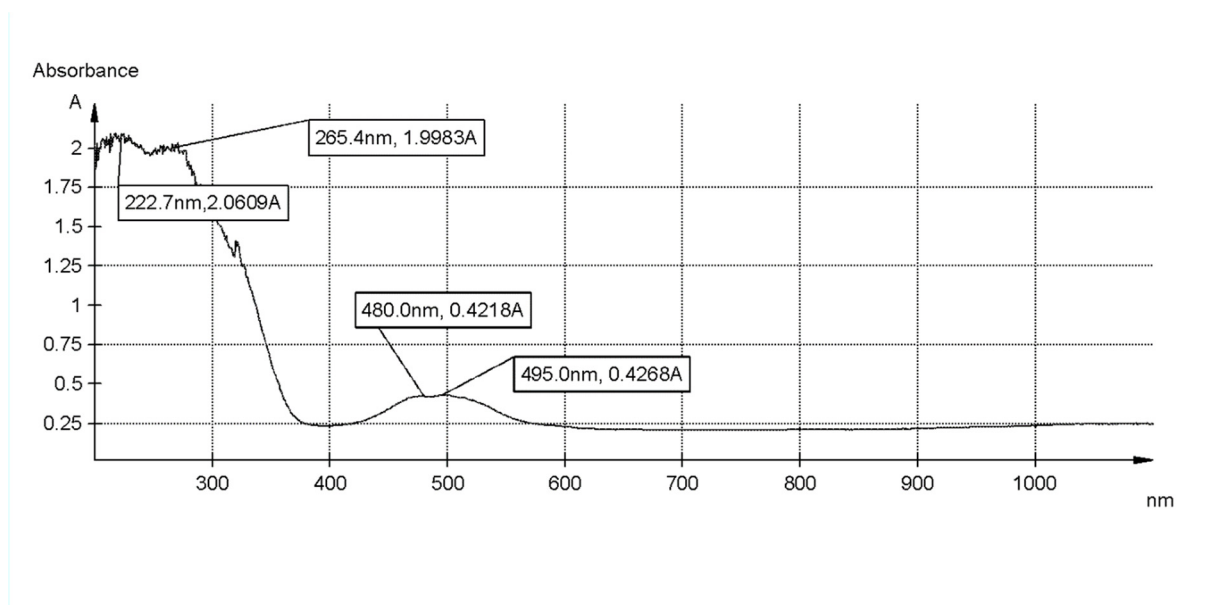

**Figure S13** The electronic spectra of complex **I** prepared from nia.

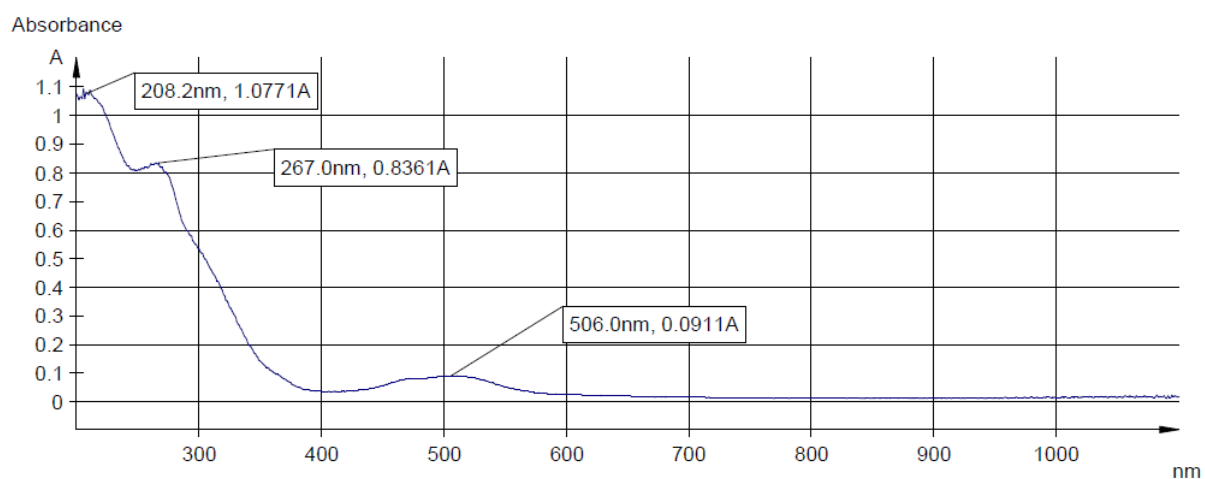

**Figure S14** The electronic spectra of complex **I** prepared from hmnia.

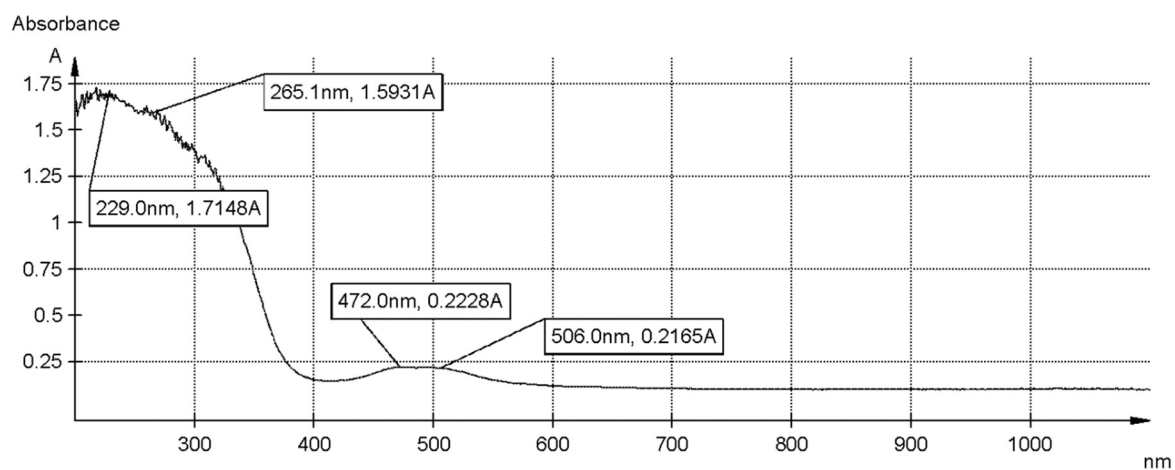

**Figure S15** The electronic spectra of complex **II**.

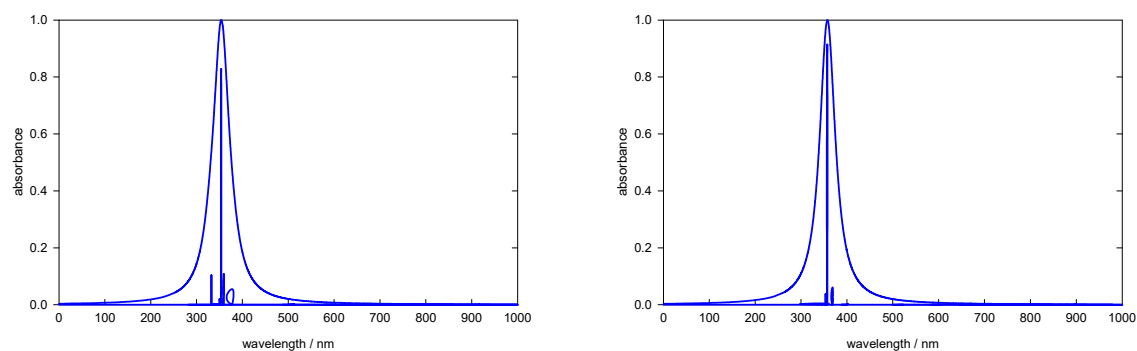

**Figure S16** Calculated electron spectrum of model molecule **1** (left) and **2** (right).

**Table S7** Wavelengths and relative intensities of selected calculated transitions in **1** and **2**.

|                  | transition number | $\lambda/\text{nm}_0$ | $f_{osc}$ |
|------------------|-------------------|-----------------------|-----------|
| complex <b>1</b> | <b>14</b>         | 332.6                 | 0.001     |
|                  | <b>11</b>         | 353.8                 | 0.016     |
|                  | <b>9</b>          | 359.4                 | 0.002     |
|                  | <b>7</b>          | 377.7                 | 0.002     |
| complex <b>2</b> | <b>9</b>          | 368.8                 | 0.002     |
|                  | <b>11</b>         | 357.3                 | 0.021     |

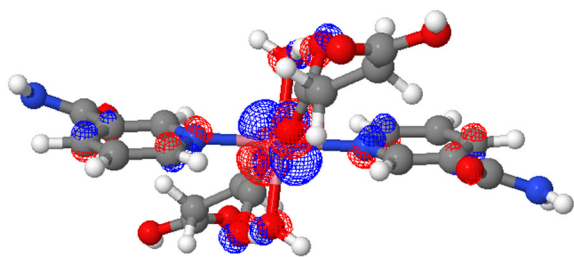

**146b**

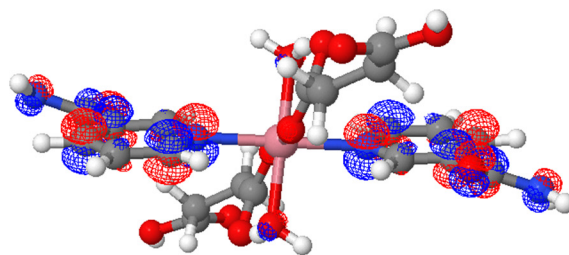

**147b**

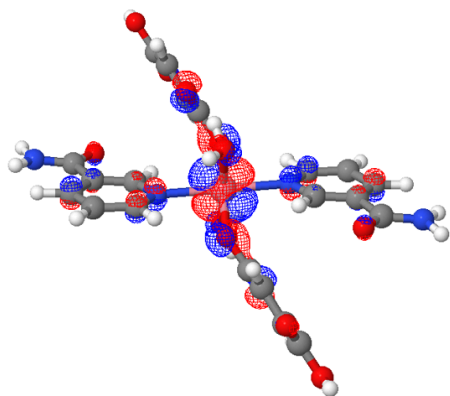

**144b**

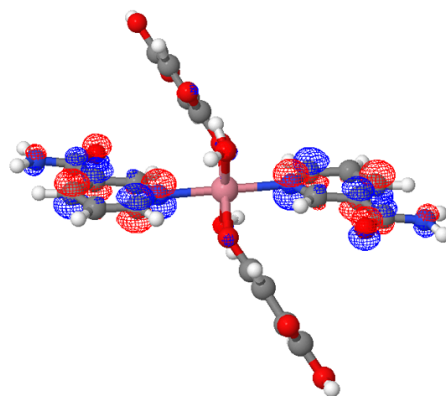

**145b**

**Figure S17** NTOs corresponding to the most intense transition in electron spectra of **1** (top) and **2** (bottom).

## S3 Computational Characterization

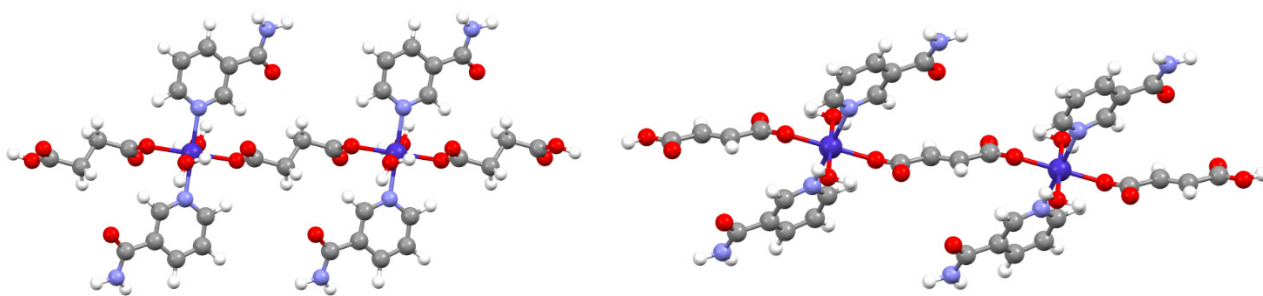

**Figure S18** Model molecules **11** (left) and **22** (right).

**Table S8** Parameters of magnetic coupling interaction in  $\text{cm}^{-1}$  for model systems **11** and **22** assessed by various DFT methods.

|              | <b>11</b> | <b>22</b> |
|--------------|-----------|-----------|
| <b>B3LYP</b> | -0.034    | -0.033    |
| <b>PBE0</b>  | -0.023    | -0.021    |
| <b>TPSSh</b> | -0.062    | -0.075    |

**Table S9.** Calculated relative energy levels of all Kramers' doublets of ground term  $^4T_{1g}$  in model molecules **1** and **2**.

| Model molecule | $E(\Gamma_a)/\text{cm}^{-1}_o$ | $E(\Gamma_b)/\text{cm}^{-1}$ | $E(\Gamma_c)/\text{cm}^{-1}$ | $E(\Gamma_d)/\text{cm}^{-1}$ | $E(\Gamma_e)/\text{cm}^{-1}$ | $E(\Gamma_f)/\text{cm}^{-1}$ |
|----------------|--------------------------------|------------------------------|------------------------------|------------------------------|------------------------------|------------------------------|
| <b>1</b>       | 0.0                            | 215.2                        | 635.3                        | 940.8                        | 1580.9                       | 1666.7                       |
| <b>2</b>       | 0.0                            | 250.2                        | 523.1                        | 885.8                        | 1322.7                       | 1420.4                       |

## S4 Dynamic Magnetic Properties

The magnetic data induced by the oscillating; alternating-current (AC) magnetic field were obtained at an amplitude of  $B_{AC} = 0.30$  mT. Collected sets of  $\chi'$  and  $\chi''$  (susceptibilities (16  $\chi'$  and 16  $\chi''$ ) at each temperature were fitted using the formulas for extended one-set Debye model

$$\chi'(\omega) = \chi_S + (\chi_T - \chi_S) \frac{1 + (\omega\tau)^{(1-\alpha)} \sin(\pi\alpha/2)}{1 + 2(\omega\tau)^{(1-\alpha)} \sin(\pi\alpha/2) + (\omega\tau)^{(2-2\alpha)}} \quad (S1)$$

$$\chi''(\omega) = (\chi_T - \chi_S) \frac{(\omega\tau)^{(1-\alpha)} \cos(\pi\alpha/2)}{1 + 2(\omega\tau)^{(1-\alpha)} \sin(\pi\alpha/2) + (\omega\tau)^{(2-2\alpha)}} \quad (S2)$$

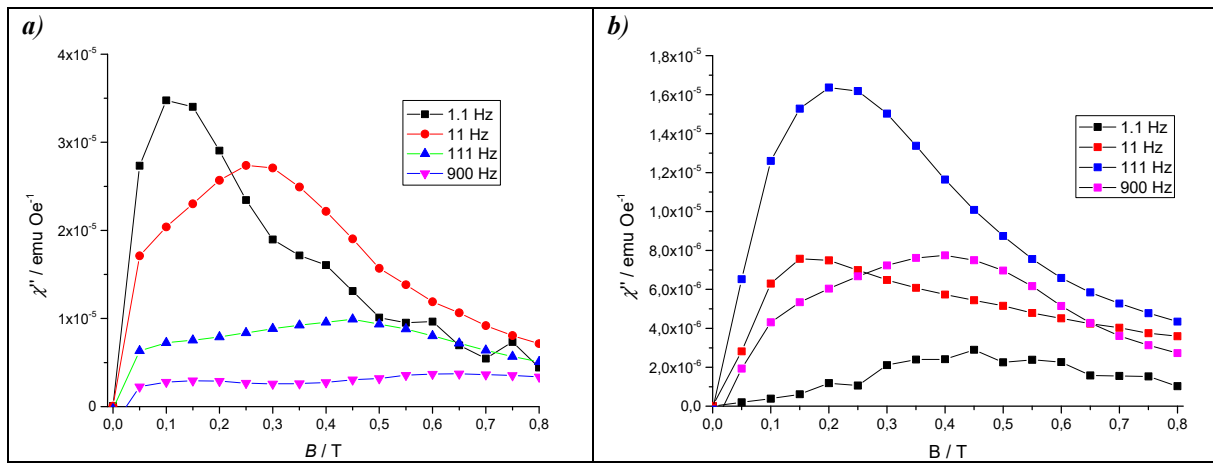

**Figure S19** Mapping of the out-of-phase susceptibility components  $\chi''$  of **I** (a) and **II** (b) as a function of the applied external  $B_{DC}$  field for a set of four frequencies of  $B_{AC}$  field at  $T=2.0$  K.

**Table S10** Conditions of AC magnetic experiments for compound **I**.

| $B_{DC}$ / T | $B_{AC}$ / mT | Temperature range    | Frequency range             |
|--------------|---------------|----------------------|-----------------------------|
| 0.02         | 3.0           | 1.8-6.4 K (26 steps) | 1.0 Hz -959.8 Hz (16 steps) |
| 0.10         | 3.0           | 1.8-8.0 K (32 steps) | 1.0 Hz -959.8 Hz (16 steps) |

**Table S11** Conditions of AC magnetic experiments for compound **II**.

| $B_{DC}$ / T | $B_{AC}$ / mT | Temperature range    | Frequency range             |
|--------------|---------------|----------------------|-----------------------------|
| 0.05         | 3.0           | 1.8-6.0 K (22 steps) | 1.0 Hz -959.8 Hz (16 steps) |
| 0.10         | 3.0           | 1.8-6.0 K (22 steps) | 1.0 Hz -959.8 Hz (16 steps) |
| 0.15         | 3.0           | 1.8-6.0 K (22 steps) | 1.0 Hz -959.8 Hz (16 steps) |
| 0.20         | 3.0           | 1.8-6.0 K (22 steps) | 1.0 Hz -959.8 Hz (16 steps) |

**Table S12** Parameters of the extended one-set Debye model (eq. S1 and S2) for **I** measured at 0.02 T.

| $T / \text{K}$ | $\chi_T / 10^{-6} \text{ m}^3 \text{ mol}^{-1}$ | $\chi_S / 10^{-6} \text{ m}^3 \text{ mol}^{-1}$ | $\alpha$  | $\tau / 10^{-3} \text{ s}$ | $R^2$   |
|----------------|-------------------------------------------------|-------------------------------------------------|-----------|----------------------------|---------|
| 1.8            | 4.6(1)                                          | 3.14(1)                                         | 0.32(3)   | 73(12)                     | 0.99965 |
| 2.0            | 4.13(7)                                         | 2.83(1)                                         | 0.30(3)   | 55(7)                      | 0.99966 |
| 2.2            | 3.73(5)                                         | 2.570(8)                                        | 0.27(3)   | 43(5)                      | 0.99968 |
| 2.4            | 3.41(4)                                         | 2.366(8)                                        | 0.25(3)   | 35(3)                      | 0.99968 |
| 2.6            | 3.14(3)                                         | 2.191(7)                                        | 0.23(3)   | 28(2)                      | 0.99969 |
| 2.8            | 2.91(3)                                         | 2.041(7)                                        | 0.21(3)   | 23(2)                      | 0.99969 |
| 3.0            | 2.72(2)                                         | 1.910(6)                                        | 0.19(3)   | 19(1)                      | 0.99969 |
| 3.2            | 2.55(2)                                         | 1.796(6)                                        | 0.17(2)   | 14.8(8)                    | 0.99970 |
| 3.4            | 2.40(2)                                         | 1.695(5)                                        | 0.15(2)   | 11.7(6)                    | 0.99969 |
| 3.6            | 2.27(1)                                         | 1.605(5)                                        | 0.12(2)   | 9.2(4)                     | 0.99970 |
| 3.8            | 2.15(1)                                         | 1.524(5)                                        | 0.10(2)   | 7.0(3)                     | 0.99971 |
| 4.0            | 2.040(9)                                        | 1.452(5)                                        | 0.08(2)   | 5.4(2)                     | 0.99973 |
| 4.2            | 1.943(8)                                        | 1.386(5)                                        | 0.06(2)   | 4.0(1)                     | 0.99973 |
| 4.4            | 1.855(7)                                        | 1.328(4)                                        | 0.04(2)   | 3.0(1)                     | 0.99974 |
| 4.6            | 1.776(6)                                        | 1.274(4)                                        | 0.03(2)   | 2.25(7)                    | 0.99976 |
| 4.8            | 1.702(5)                                        | 1.225(4)                                        | 0.01(2)   | 1.68(5)                    | 0.99977 |
| 5.0            | 1.636(5)                                        | 1.181(4)                                        | 0.002(17) | 1.25(3)                    | 0.99978 |
| 5.2            | 1.575(4)                                        | 1.139(3)                                        | 0.00(0)   | 0.94(2)                    | 0.99979 |
| 5.4            | 1.519(4)                                        | 1.102(4)                                        | 0.000(4)  | 0.71(2)                    | 0.99979 |
| 5.6            | 1.467(4)                                        | 1.066(4)                                        | 0.00(0)   | 0.53(1)                    | 0.99979 |
| 5.8            | 1.420(4)                                        | 1.030(8)                                        | 0.01(2)   | 0.40(1)                    | 0.99978 |
| 6.0            | 1.375(4)                                        | 0.99(1)                                         | 0.03(2)   | 0.30(1)                    | 0.99979 |
| 6.2            | 1.333(3)                                        | 0.94(2)                                         | 0.06(3)   | 0.21(1)                    | 0.99980 |
| 6.4            | 1.293(3)                                        | 0.86(3)                                         | 0.06(3)   | 0.13(1)                    | 0.99984 |
| 6.6            | 1.255(3)                                        | 0.73(6)                                         | 0.13(3)   | 0.07(1)                    | 0.99989 |
| 6.8            | 1.219(2)                                        | 0.3(3)                                          | 0.16(3)   | 0.02(1)                    | 0.99992 |

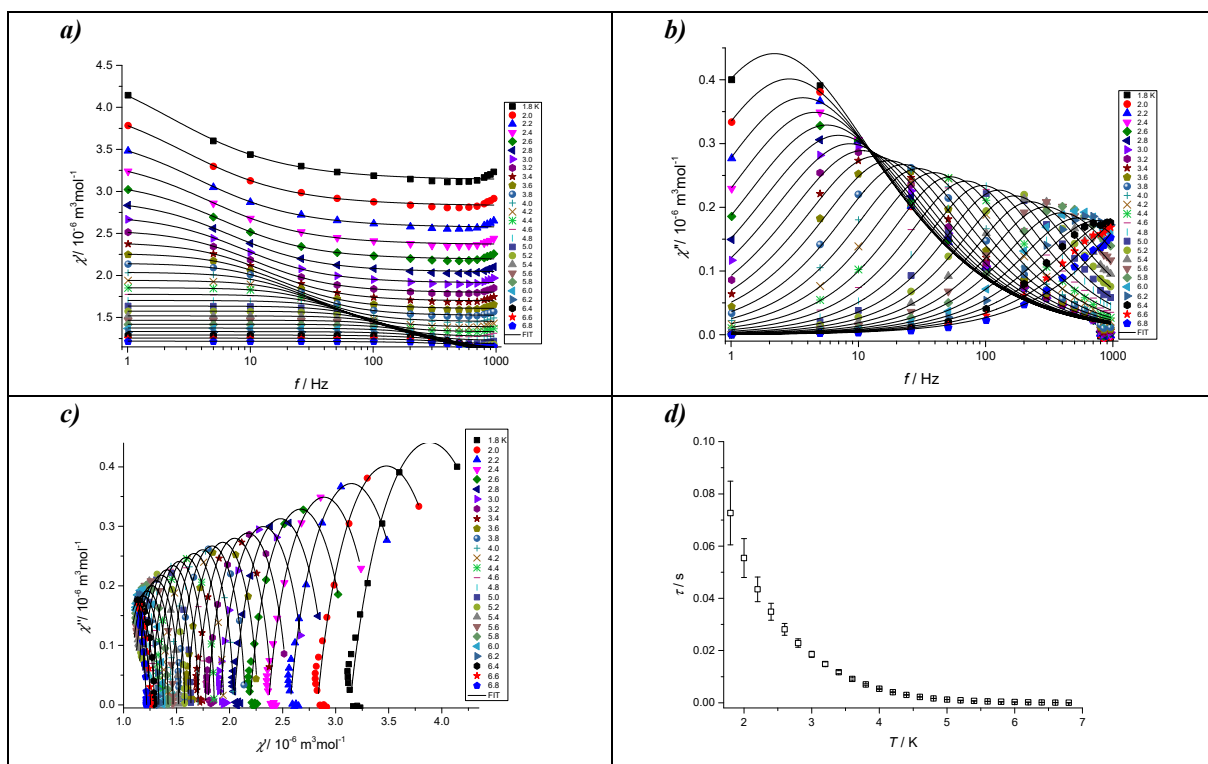

**Figure S20** AC susceptibility data for **I** recorded at various temperatures at 0.02 T: Frequency dependent in-phase  $\chi'$ (a) and out-of-phase  $\chi''$ (b) component of AC susceptibility and Cole-Cole diagram (c) (solid lines are results of fits according to equations S1 and S2). Temperature dependency of relaxation time  $\tau$  with standard errors

**Table S13** Parameters of the extended one-set Debye model (eq. S1 and S2) for **I** measured at 0.1 T.

| $T/\text{K}$ | $\chi_T / 10^{-6} \text{ m}^3 \text{ mol}^{-1}$ | $\chi_S / 10^{-6} \text{ m}^3 \text{ mol}^{-1}$ | $\alpha$ | $\tau / 10^{-3} \text{ s}$ | $R^2$   |
|--------------|-------------------------------------------------|-------------------------------------------------|----------|----------------------------|---------|
| 1.8          | 5.2(2)                                          | 0.41(1)                                         | 0.39(1)  | 165(17)                    | 0.99752 |
| 2.0          | 4.7(1)                                          | 0.381(9)                                        | 0.38(1)  | 135(12)                    | 0.99801 |
| 2.2          | 4.1(1)                                          | 0.36(1)                                         | 0.36(1)  | 100(8)                     | 0.99760 |
| 2.4          | 3.6(1)                                          | 0.35(1)                                         | 0.32(2)  | 72(5)                      | 0.99645 |
| 2.6          | 3.22(7)                                         | 0.334(9)                                        | 0.30(1)  | 54(3)                      | 0.99710 |
| 2.8          | 2.98(6)                                         | 0.320(9)                                        | 0.27(1)  | 43(2)                      | 0.99688 |
| 3.0          | 2.70(4)                                         | 0.304(8)                                        | 0.26(1)  | 33(1)                      | 0.99774 |
| 3.2          | 2.52(4)                                         | 0.296(9)                                        | 0.22(1)  | 26(1)                      | 0.99693 |
| 3.4          | 2.34(3)                                         | 0.283(7)                                        | 0.20(1)  | 19.7(6)                    | 0.99798 |
| 3.6          | 2.22(2)                                         | 0.273(7)                                        | 0.18(1)  | 15.3(4)                    | 0.99807 |
| 3.8          | 2.06(2)                                         | 0.263(7)                                        | 0.15(1)  | 11.0(3)                    | 0.99840 |
| 4.0          | 1.96(1)                                         | 0.255(6)                                        | 0.121(9) | 8.1(2)                     | 0.99883 |
| 4.2          | 1.875(9)                                        | 0.242(4)                                        | 0.113(7) | 6.03(8)                    | 0.99943 |
| 4.4          | 1.775(8)                                        | 0.235(4)                                        | 0.088(7) | 4.33(5)                    | 0.99944 |
| 4.6          | 1.698(6)                                        | 0.227(4)                                        | 0.076(6) | 3.16(3)                    | 0.99960 |
| 4.8          | 1.617(5)                                        | 0.219(4)                                        | 0.061(5) | 2.28(2)                    | 0.99967 |
| 5.0          | 1.552(5)                                        | 0.213(4)                                        | 0.047(5) | 1.66(1)                    | 0.99963 |
| 5.2          | 1.495(2)                                        | 0.204(3)                                        | 0.043(4) | 1.220(9)                   | 0.99976 |
| 5.4          | 1.437(2)                                        | 0.199(3)                                        | 0.034(3) | 0.903(4)                   | 0.99987 |
| 5.6          | 1.393(2)                                        | 0.191(3)                                        | 0.031(3) | 0.677(3)                   | 0.99988 |
| 5.8          | 1.343(2)                                        | 0.187(4)                                        | 0.024(4) | 0.509(3)                   | 0.99982 |
| 6.0          | 1.300(2)                                        | 0.179(5)                                        | 0.022(4) | 0.386(2)                   | 0.99986 |
| 6.2          | 1.262(2)                                        | 0.174(6)                                        | 0.019(5) | 0.296(2)                   | 0.99984 |
| 6.4          | 1.218(2)                                        | 0.168(9)                                        | 0.014(6) | 0.227(2)                   | 0.99983 |
| 6.6          | 1.187(3)                                        | 0.15(2)                                         | 0.019(8) | 0.175(3)                   | 0.99976 |
| 6.8          | 1.153(2)                                        | 0.12(2)                                         | 0.023(8) | 0.133(3)                   | 0.99987 |
| 7.0          | 1.123(3)                                        | 0.08(4)                                         | 0.037(1) | 0.100(5)                   | 0.99977 |
| 7.2          | 1.093(3)                                        | 0(1)                                            | 0.031(7) | 0.0728(7)                  | 0.99975 |
| 7.4          | 1.65(2)                                         | 0(0)                                            | 0.015(6) | 0.0590(6)                  | 0.99987 |
| 7.6          | 1.038(2)                                        | 0(0)                                            | 0.0(0)   | 0.0484(5)                  | 0.99982 |
| 7.8          | 1.015(2)                                        | 0.000(2)                                        | 0.0(0)   | 0.0390(6)                  | 0.99979 |
| 8.0          | 0.993(2)                                        | 0.000(0)                                        | 0.000(0) | 0.0318(6)                  | 0.99973 |

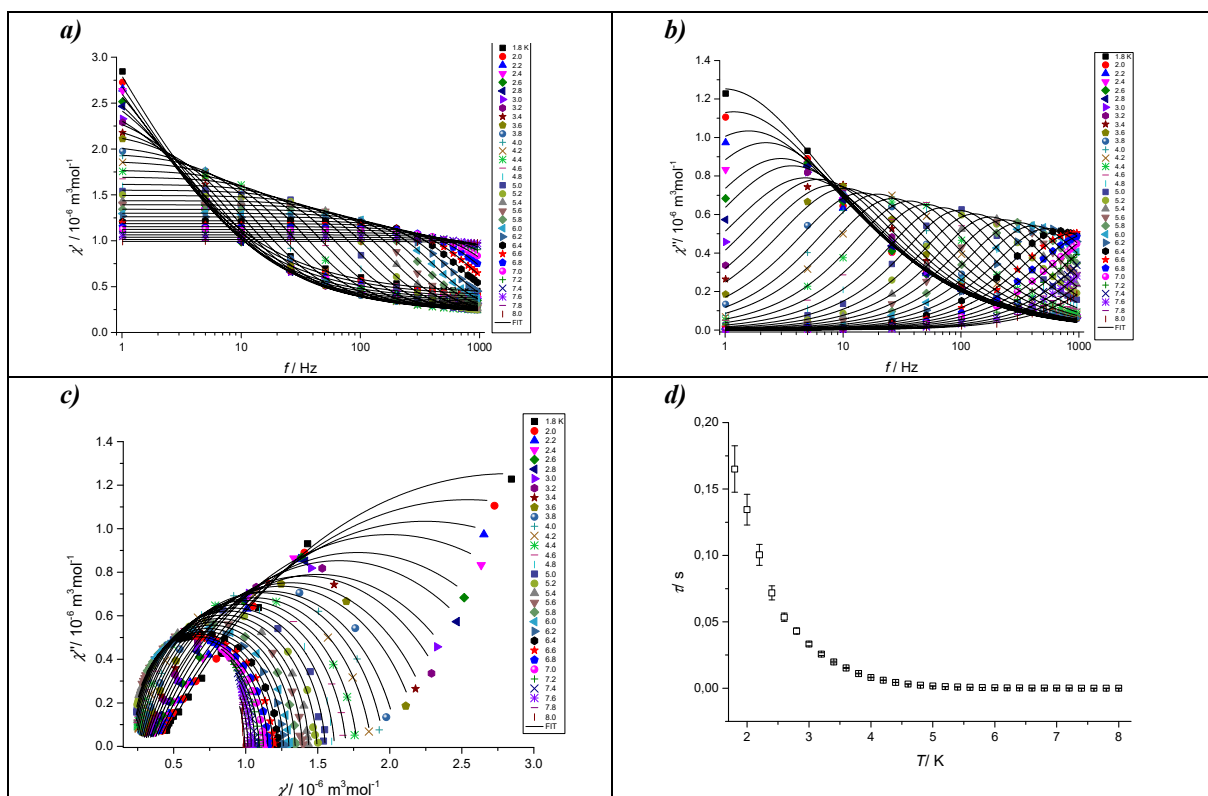

**Figure S21** AC susceptibility data for **I** recorded at various temperatures at 0.1 T: Frequency dependent in-phase  $\chi'$ (a) and out-of-phase  $\chi''$ (b) component of AC susceptibility and Cole-Cole diagram (c) (solid lines are results of fits according to equations S1 and S2). Temperature dependency of relaxation time  $\tau$  with standard errors

**Table S14** Parameters of the extended one-set Debye model (eq. S1 and S2) for **II** measured at 0.05 T.

| <i>T</i> / K | $\chi_T/ 10^{-6}\text{m}^3 \text{mol}^{-1}$ | $\chi_S/ 10^{-6}\text{m}^3 \text{mol}^{-1}$ | $\alpha$ | $\tau/ 10^{-3} \text{ s}$ | $R^2$   |
|--------------|---------------------------------------------|---------------------------------------------|----------|---------------------------|---------|
| 1.8          | 16.90(7)                                    | 11.30(5)                                    | 0.21(2)  | 2.15(8)                   | 0.99976 |
| 2.0          | 15.12(6)                                    | 10.21(5)                                    | 0.20(2)  | 1.74(6)                   | 0.99977 |
| 2.2          | 13.70(5)                                    | 9.30(5)                                     | 0.19(2)  | 1.43(5)                   | 0.99977 |
| 2.4          | 12.56(5)                                    | 8.58(5)                                     | 0.19(2)  | 1.20(4)                   | 0.99977 |
| 2.6          | 11.60(4)                                    | 7.96(5)                                     | 0.19(2)  | 1.02(3)                   | 0.99978 |
| 2.8          | 10.77(4)                                    | 7.41(5)                                     | 0.19(2)  | 0.88(3)                   | 0.99978 |
| 3.0          | 10.06(3)                                    | 6.96(5)                                     | 0.19(2)  | 0.78(3)                   | 0.99977 |
| 3.2          | 9.43(3)                                     | 6.55(5)                                     | 0.19(2)  | 0.67(2)                   | 0.99977 |
| 3.4          | 8.89(3)                                     | 6.19(6)                                     | 0.19(2)  | 0.60(2)                   | 0.99977 |
| 3.6          | 8.40(3)                                     | 5.86(6)                                     | 0.19(2)  | 0.53(2)                   | 0.99976 |
| 3.8          | 7.97(3)                                     | 5.57(6)                                     | 0.19(2)  | 0.47(2)                   | 0.99976 |
| 4.0          | 7.57(3)                                     | 5.31(7)                                     | 0.18(3)  | 0.42(2)                   | 0.99975 |
| 4.2          | 7.22(2)                                     | 5.07(7)                                     | 0.18(3)  | 0.37(2)                   | 0.99975 |
| 4.4          | 6.90(2)                                     | 4.85(8)                                     | 0.18(3)  | 0.32(2)                   | 0.99974 |
| 4.6          | 6.60(2)                                     | 4.64(9)                                     | 0.17(3)  | 0.28(2)                   | 0.99974 |
| 4.8          | 6.33(2)                                     | 4.4(1)                                      | 0.17(3)  | 0.24(2)                   | 0.99974 |
| 5.0          | 6.08(2)                                     | 4.23(1)                                     | 0.16(4)  | 0.20(2)                   | 0.99975 |
| 5.2          | 5.85(2)                                     | 4.01(1)                                     | 0.16(4)  | 0.16(2)                   | 0.99977 |
| 5.4          | 5.64(2)                                     | 3.8(2)                                      | 0.16(4)  | 0.13(2)                   | 0.99979 |
| 5.6          | 5.44(1)                                     | 3.4(2)                                      | 0.17(4)  | 0.09(2)                   | 0.99983 |
| 5.8          | 5.26(1)                                     | 2.8(5)                                      | 0.19(4)  | 0.05(2)                   | 0.99987 |
| 6.0          | 5.08(1)                                     | 1(2)                                        | 0.21(4)  | 0.02(1)                   | 0.99990 |

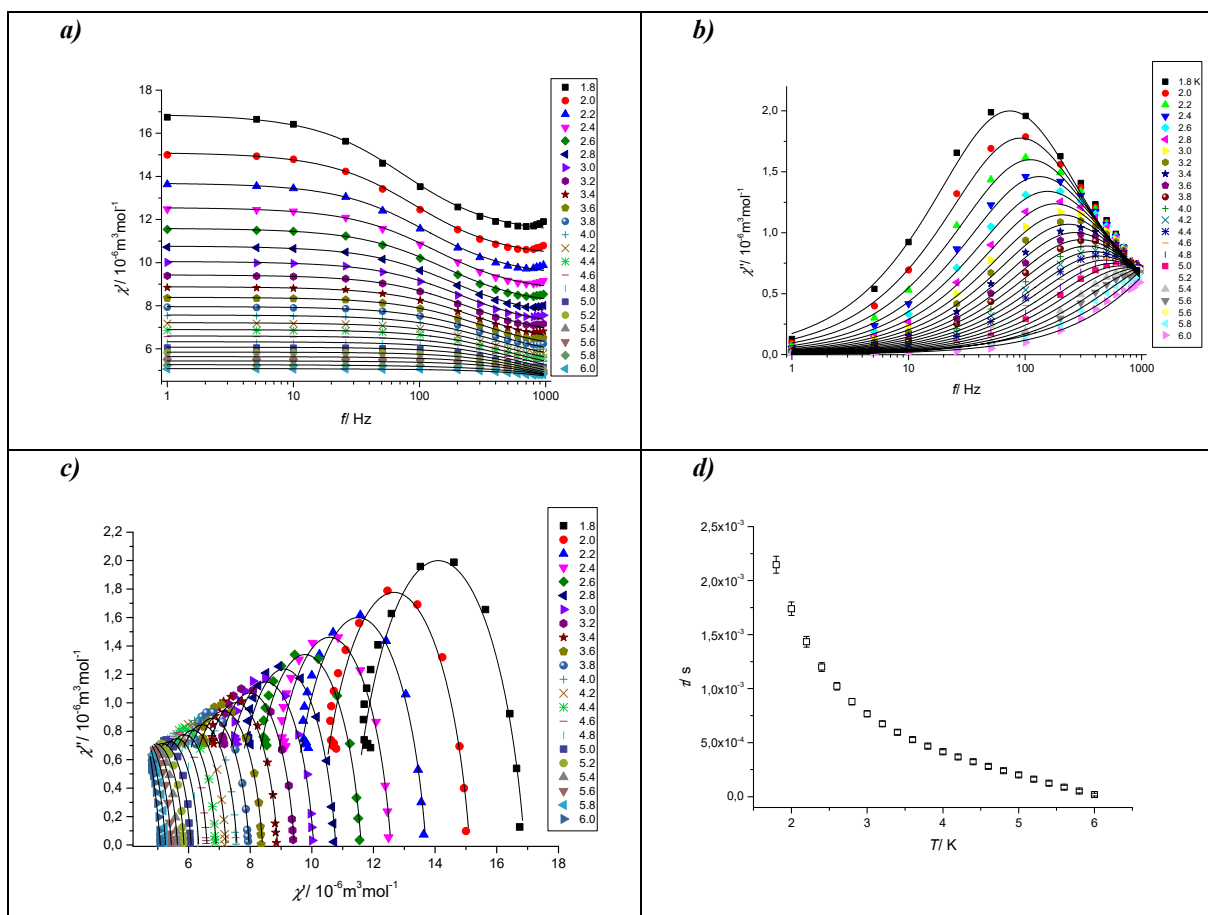

**Figure S22** AC susceptibility data for **II** recorded at various temperatures at 0.05 T: Frequency dependent in-phase  $\chi'$ (a) and out-of-phase  $\chi''$ (b) component of AC susceptibility and Cole-Cole diagram (c) (solid lines are results of fits according to equations S1 and S2). Temperature dependency of relaxation time  $\tau$  with standard errors

**Table S15** Parameters of the extended one-set Debye model (eq. S1 and S2) for **II** measured at 0.1 T.

| $T/\text{K}$ | $\chi_T/10^{-6}\text{m}^3\text{mol}^{-1}$ | $\chi_S/10^{-6}\text{m}^3\text{mol}^{-1}$ | $\alpha$ | $\tau/10^{-3}\text{s}$ | $R^2$   |
|--------------|-------------------------------------------|-------------------------------------------|----------|------------------------|---------|
| 1.8          | 16.70(9)                                  | 5.87(7)                                   | 0.24(1)  | 2.52(6)                | 0.99937 |
| 2.0          | 14.93(7)                                  | 5.36(6)                                   | 0.23(1)  | 2.05(5)                | 0.99949 |
| 2.2          | 13.54(6)                                  | 4.92(5)                                   | 0.227(9) | 1.68(3)                | 0.99959 |
| 2.4          | 12.46(5)                                  | 4.56(5)                                   | 0.224(9) | 1.41(3)                | 0.99965 |
| 2.6          | 11.51(4)                                  | 4.24(5)                                   | 0.219(9) | 1.19(2)                | 0.99968 |
| 2.8          | 10.70(4)                                  | 3.98(3)                                   | 0.214(9) | 1.01(2)                | 0.99968 |
| 3.0          | 10.01(7)                                  | 3.68(1)                                   | 0.23(2)  | 0.84(3)                | 0.99878 |
| 3.2          | 9.39(3)                                   | 3.55(4)                                   | 0.208(9) | 0.77(1)                | 0.99973 |
| 3.4          | 8.85(3)                                   | 3.38(4)                                   | 0.204(9) | 0.68(1)                | 0.99974 |
| 3.6          | 8.36(3)                                   | 3.21(5)                                   | 0.20(1)  | 0.60(1)                | 0.99969 |
| 3.8          | 7.93(2)                                   | 3.08(5)                                   | 0.19(1)  | 0.540(9)               | 0.99973 |
| 4.0          | 7.55(2)                                   | 2.96(5)                                   | 0.18(1)  | 0.485(9)               | 0.99973 |
| 4.2          | 7.19(2)                                   | 2.85(5)                                   | 0.17(1)  | 0.434(8)               | 0.99971 |
| 4.4          | 6.87(3)                                   | 2.85(9)                                   | 0.16(2)  | 0.40(1)                | 0.99916 |
| 4.6          | 6.58(2)                                   | 2.66(6)                                   | 0.15(1)  | 0.347(8)               | 0.99970 |
| 4.8          | 6.31(2)                                   | 2.59(6)                                   | 0.14(1)  | 0.308(8)               | 0.99969 |
| 5.0          | 6.06(2)                                   | 2.50(7)                                   | 0.12(1)  | 0.271(7)               | 0.99969 |
| 5.2          | 5.83(2)                                   | 2.42(7)                                   | 0.11(1)  | 0.236(7)               | 0.99970 |
| 5.4          | 5.62(2)                                   | 2.34(8)                                   | 0.10(2)  | 0.203(7)               | 0.99972 |
| 5.6          | 5.42(1)                                   | 2.23(9)                                   | 0.09(2)  | 0.171(7)               | 0.99975 |
| 5.8          | 5.24(1)                                   | 2.1(1)                                    | 0.08(2)  | 0.141(7)               | 0.99980 |
| 6.0          | 5.07(1)                                   | 1.9(1)                                    | 0.08(2)  | 0.113(7)               | 0.99984 |

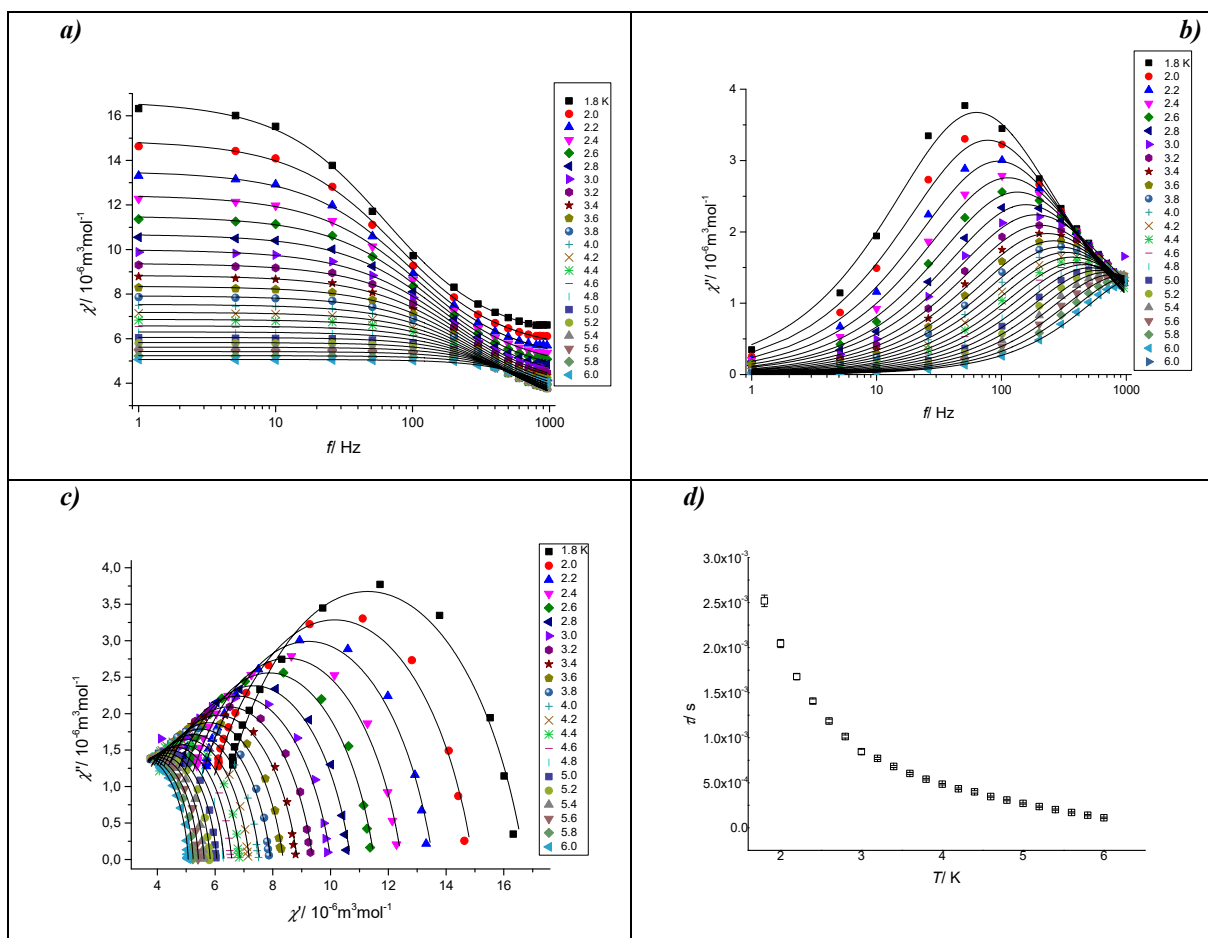

**Figure S23** AC susceptibility data for **II** recorded at various temperatures at 1000 Oe: Frequency dependent in-phase  $\chi'$ (a) and out-of-phase  $\chi''$ (b) component of AC susceptibility and Cole-Cole diagram (c) (solid lines are results of fits according to equations S1 and S2). Temperature dependency of relaxation time  $\tau$  with standard errors

**Table S16** Parameters of the extended one-set Debye model (eq. S1 and S2) for **II** measured at 0.15 T.

| $T/\text{K}$ | $\chi_T/10^{-6} \text{ m}^3 \text{ mol}^{-1}$ | $\chi_S/10^{-6} \text{ m}^3 \text{ mol}^{-1}$ | $\alpha$ | $\tau/10^{-3} \text{ s}$ | $R^2$   |
|--------------|-----------------------------------------------|-----------------------------------------------|----------|--------------------------|---------|
| 1.8          | 81.4(5)                                       | 17.9(4)                                       | 0.24(1)  | 2.54(7)                  | 0.99899 |
| 2.0          | 73.1(4)                                       | 16.4(3)                                       | 0.23(1)  | 2.11(5)                  | 0.99923 |
| 2.2          | 66.6(3)                                       | 15.2(3)                                       | 0.228(9) | 1.76(3)                  | 0.99939 |
| 2.4          | 61.5(3)                                       | 14.2(3)                                       | 0.222(9) | 1.49(3)                  | 0.99943 |
| 2.6          | 57.1(2)                                       | 13.3(3)                                       | 0.218(8) | 1.27(2)                  | 0.99952 |
| 2.8          | 53.3(2)                                       | 12.5(2)                                       | 0.216(8) | 1.09(2)                  | 0.99958 |
| 3.0          | 49.9(2)                                       | 11.8(2)                                       | 0.212(8) | 0.95(1)                  | 0.99960 |
| 3.2          | 46.9(2)                                       | 11.2(2)                                       | 0.209(8) | 0.83(1)                  | 0.99962 |
| 3.4          | 44.3(1)                                       | 10.7(1)                                       | 0.207(8) | 0.73(1)                  | 0.99965 |
| 3.6          | 42.0(1)                                       | 10.2(3)                                       | 0.203(9) | 0.651(1)                 | 0.99963 |
| 3.8          | 39.8(1)                                       | 9.8(3)                                        | 0.195(9) | 0.58(9)                  | 0.99964 |
| 4.0          | 37.9(1)                                       | 9.5(3)                                        | 0.188(9) | 0.52(8)                  | 0.99963 |
| 4.2          | 36.2(1)                                       | 9.2(3)                                        | 0.18(1)  | 0.46(8)                  | 0.99962 |
| 4.4          | 34.6(1)                                       | 8.9(3)                                        | 0.17(1)  | 0.42(7)                  | 0.99963 |
| 4.6          | 33.2(1)                                       | 8.7(3)                                        | 0.16(1)  | 0.37(7)                  | 0.99962 |
| 4.8          | 31.8(1)                                       | 8.4(3)                                        | 0.15(1)  | 0.33(7)                  | 0.99964 |
| 5.0          | 30.62(9)                                      | 8.1(3)                                        | 0.13(1)  | 0.29(6)                  | 0.99964 |
| 5.2          | 29.48(9)                                      | 7.9(4)                                        | 0.12(1)  | 0.25(6)                  | 0.99968 |
| 5.4          | 28.42(8)                                      | 7.5(4)                                        | 0.11(1)  | 0.22(6)                  | 0.99973 |
| 5.6          | 27.43(7)                                      | 7.1(4)                                        | 0.10(1)  | 0.18(6)                  | 0.99976 |
| 5.8          | 26.52(6)                                      | 6.6(5)                                        | 0.10(1)  | 0.15(5)                  | 0.99982 |
| 6.0          | 25.69(7)                                      | 5.2(8)                                        | 0.10(2)  | 0.12(7)                  | 0.99972 |

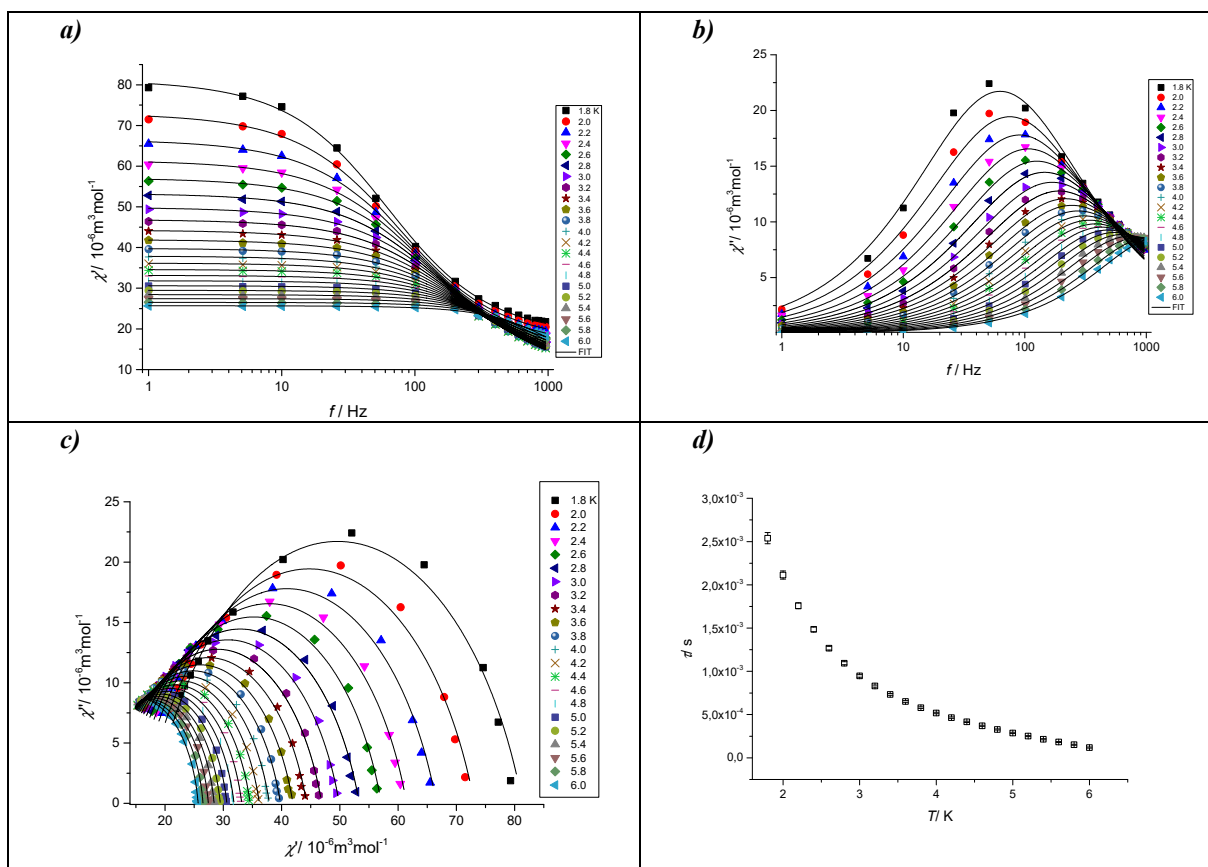

**Figure S24** AC susceptibility data for **II** recorded at various temperatures at 0.15 T: Frequency dependent in-phase  $\chi'$ (a) and out-of-phase  $\chi''$ (b) component of AC susceptibility and Cole-Cole diagram (c) (solid lines are results of fits according to equations S1 and S2). Temperature dependency of relaxation time  $\tau$  with standard errors

**Table S17** Parameters of the extended one-set Debye model (eq. S1 and S2) for **II** measured at 0.2 T.

| $T/\text{K}$ | $\chi_T / 10^{-6} \text{ m}^3 \text{ mol}^{-1}$ | $\chi_S / 10^{-6} \text{ m}^3 \text{ mol}^{-1}$ | $\alpha$ | $\tau / 10^{-3} \text{ s}$ | $R^2$   |
|--------------|-------------------------------------------------|-------------------------------------------------|----------|----------------------------|---------|
| 1.8          | 81.4(5)                                         | 17.9(4)                                         | 0.24(1)  | 2.54(7)                    | 0.99899 |
| 2.0          | 73.1(4)                                         | 16.4(3)                                         | 0.23(1)  | 2.11(5)                    | 0.99923 |
| 2.2          | 66.6(3)                                         | 15.2(3)                                         | 0.228(9) | 1.76(3)                    | 0.99939 |
| 2.4          | 61.5(3)                                         | 14.2(3)                                         | 0.222(9) | 1.49(3)                    | 0.99943 |
| 2.6          | 57.1(2)                                         | 13.3(3)                                         | 0.218(8) | 1.27(2)                    | 0.99953 |
| 2.8          | 53.3(2)                                         | 12.5(2)                                         | 0.216(8) | 1.09(2)                    | 0.99958 |
| 3.0          | 49.9(2)                                         | 11.8(2)                                         | 0.212(8) | 0.94(1)                    | 0.99960 |
| 3.2          | 46.9(2)                                         | 11.2(2)                                         | 0.209(8) | 0.83(1)                    | 0.99962 |
| 3.4          | 44.3(1)                                         | 10.7(2)                                         | 0.207(8) | 0.73(1)                    | 0.99965 |
| 3.6          | 42.0(1)                                         | 10.2(2)                                         | 0.203(9) | 0.65(1)                    | 0.99963 |
| 3.8          | 39.8(1)                                         | 9.8(2)                                          | 0.195(9) | 0.580(9)                   | 0.99964 |
| 4.0          | 37.9(1)                                         | 9.5(2)                                          | 0.188(9) | 0.52(8)                    | 0.99963 |
| 4.2          | 36.2(1)                                         | 9.2(3)                                          | 0.18(1)  | 0.465(8)                   | 0.99962 |
| 4.4          | 34.6(1)                                         | 8.9(3)                                          | 0.17(1)  | 0.415(7)                   | 0.99963 |
| 4.6          | 33.2(1)                                         | 8.7(3)                                          | 0.16(1)  | 0.370(7)                   | 0.99962 |
| 4.8          | 31.8(1)                                         | 8.4(3)                                          | 0.15(1)  | 0.328(7)                   | 0.99964 |
| 5.0          | 30.6(1)                                         | 8.1(3)                                          | 0.14(1)  | 0.288(6)                   | 0.99964 |
| 5.2          | 29.48(9)                                        | 7.9(4)                                          | 0.12(1)  | 0.251(6)                   | 0.99968 |
| 5.4          | 28.42(8)                                        | 7.5(4)                                          | 0.11(1)  | 0.215(6)                   | 0.99973 |
| 5.6          | 27.43(7)                                        | 7.1(4)                                          | 0.10(1)  | 0.183(6)                   | 0.99976 |
| 5.8          | 26.52(6)                                        | 6.6(5)                                          | 0.10(1)  | 0.152(5)                   | 0.99982 |
| 6.0          | 25.69(7)                                        | 5.3(8)                                          | 0.10(2)  | 0.119(7)                   | 0.99972 |

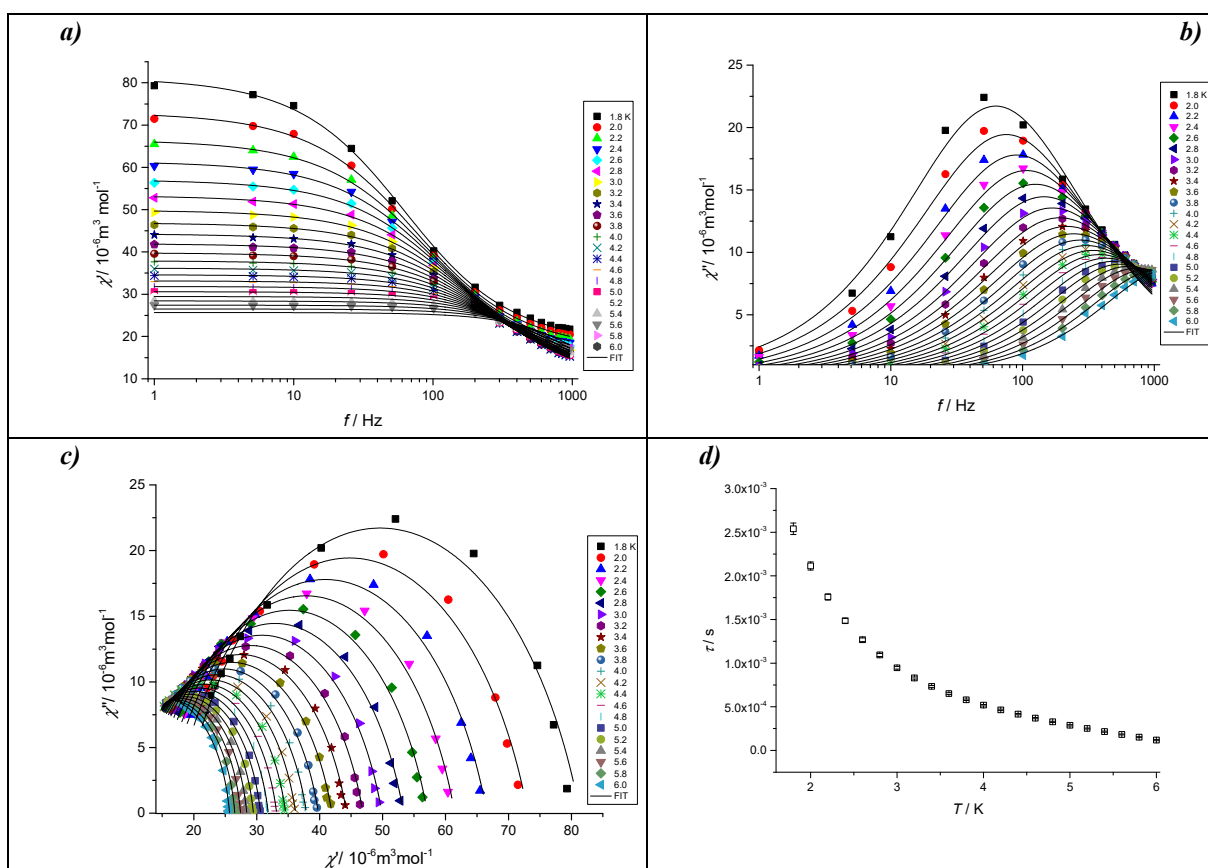

**Figure S25** AC susceptibility data for **II** recorded at various temperatures at 0.2 T: Frequency dependent in-phase  $\chi'$  (a) and out-of-phase  $\chi''$  (b) component of AC susceptibility and Cole-Cole diagram (c) (solid lines are results of fits according to equations S1 and S2). Temperature dependency of relaxation time  $\tau$  with standard errors

**Table S18** Relaxation parameters for compound **I** using the combination of Raman and direct mechanisms

| Model                              | $U/k_B / K$ | $\tau_0/s$              | $C / K^{-n} s^{-1}; n$      | $AB^m / T^{-m} K^{-1} s^{-1}$ | $R^2$   |
|------------------------------------|-------------|-------------------------|-----------------------------|-------------------------------|---------|
| 0.02 T Orbach+Raman*               | 6.2(3)      | $2.6(3) \times 10^{-4}$ | $3.51(8) \times 10^{-4}; 9$ | -                             | 0.99882 |
| 0.02 T Raman+direct*               | -           | -                       | $2.2(3) \times 10^{-3}; 9$  | 368(28)                       | 0.95783 |
| 0.02 T Orbach<br>for 4.0 K – 6.4 K | 52(2)       | $6(2) \times 10^{-8}$   | -                           | -                             | 0.98974 |
| 0.10 T Orbach+Raman*               | 7.42(3)     | $3.2(3) \times 10^{-4}$ | $2.53(4) \times 10^{-4}; 9$ | -                             | 0.99945 |
| 0.10 T Raman+direct*               | -           | -                       | $2.8(2) \times 10^{-4}; 9$  | 5.7(5)                        | 0.99347 |
| 0.10 T Orbach<br>for 4.8 K – 8.0 K | 38(2)       | $5(2) \times 10^{-7}$   | -                           | -                             | 0.97227 |

\*Raman exponent has been fixed to n=9

**Table S19** Relaxation parameters at  $B_{DC} = 0.05$  T for compound **II** using the respective combinations of Orbach, Raman and Direct mechanisms.

| Model                       | $U/k_B / K$ | $\tau_0/s$               | $C / K^{-n} s^{-1}; n$ | $AB^m / T^{-m} K^{-1} s^{-1}$ | $R^2$   |
|-----------------------------|-------------|--------------------------|------------------------|-------------------------------|---------|
| Orbach+Raman*               | 4.2(7)      | $2.0(5) \times 10^{-4}$  | 0.0021(2); 9           | -                             | 0.96897 |
| Orbach+direct               | 60(9)       | $2(3) \times 10^{-9}$    | -                      | 411(33)                       | 0.95152 |
| Raman+direct*               | -           | -                        | 0.0022(3); 9           | 368(28)                       | 0.95783 |
| Orbach+Raman+direct*        | 4.3(7)      | $2.1(5) \times 10^{-4}$  | 0.0021(3); 9           | 20(0)                         | 0.96886 |
| Orbach<br>for 5.0 K – 6.0 K | 65(12)      | $5.8(2) \times 10^{-10}$ | -                      | -                             | 0.85798 |

\*Raman exponent has been fixed to n=9

**Table S20** Relaxation parameters at  $B_{DC} = 0.1$  T for compound **II** using the respective combinations of Orbach, Raman and Direct processes of relaxation.

| Model                       | $U/k_B / K$ | $\tau_0/s$               | $C / K^{-n} s^{-1}; n$     | $AB^m / T^{-m} K^{-1} s^{-1}$ | $R^2$   |
|-----------------------------|-------------|--------------------------|----------------------------|-------------------------------|---------|
| Orbach+Raman*               | 5.3(7)      | $1.41(5) \times 10^{-4}$ | 6.0(2); 9                  | -                             | 0.99793 |
| Orbach+direct               | 19(2)       | $8(3) \times 10^{-6}$    | -                          | 266(17)                       | 0.98391 |
| Raman+direct                | -           | -                        | 5(2); 3.9(3)               | 218(20)                       | 0.99162 |
| Orbach+Raman+direct*        | 7.9(3)      | $1.08(5) \times 10^{-4}$ | $5.1(1) \times 10^{-4}; 9$ | 153(8)                        | 0.99978 |
| Orbach<br>for 5.0 K – 6.0 K | 26(2)       | $1.6(6) \times 10^{-6}$  | -                          | -                             | 0.97412 |

\*Raman exponent has been fixed to n=9

**Table S21** Relaxation parameters at  $B_{DC} = 0.15$  T for compound **II** using the respective combinations of Orbach, Raman and Direct processes of relaxation.

| Model                       | $U/k_B / \text{K}$ | $\tau_0/\text{s}$        | $C / \text{K}^{-n} \text{s}^{-1}; n$ | $AB^m / T^{-m} \text{K}^{-1} \text{s}^{-1}$ | $R^2$   |
|-----------------------------|--------------------|--------------------------|--------------------------------------|---------------------------------------------|---------|
| Orbach+Raman                | 4.5(2)             | $2.2(2) \times 10^{-4}$  | 0.05(4); 6.5(4)                      | -                                           | 0.99695 |
| Orbach+direct               | 20(2)              | $7(2) \times 10^{-6}$    | -                                    | 259(14)                                     | 0.98695 |
| Raman+direct                | -                  | -                        | 3(2); 4.1(3)                         | 220(15)                                     | 0.99362 |
| Orbach+Raman+direct         | 9.9(3)             | $7.7(5) \times 10^{-5}$  | $4(2) \times 10^{-5}$ ; 10.4(3)      | 190(4)                                      | 0.99993 |
| Orbach+Raman+direct*        | 8.8(3)             | $1.02(5) \times 10^{-5}$ | $4.7(1) \times 10^{-4}$ ; 9          | 178(5)                                      | 0.9998  |
| Orbach<br>for 5.0 K – 6.0 K | 26(2)              | $1.7(2) \times 10^{-6}$  | -                                    | -                                           | 0.97153 |

\*Raman exponent has been fixed to  $n=9$

**Table S22** Relaxation parameters at  $B_{DC} = 0.20$  T for compound **II** using the respective combinations of Orbach, Raman and Direct processes of relaxation.

| Model                       | $U/k_B / \text{K}$ | $\tau_0/\text{s}$        | $C / \text{K}^{-n} \text{s}^{-1}; n$ | $AB^m / T^{-m} \text{K}^{-1} \text{s}^{-1}$ | $R^2$   |
|-----------------------------|--------------------|--------------------------|--------------------------------------|---------------------------------------------|---------|
| Orbach+Raman                | 4.5(2)             | $2.2(2) \times 10^{-4}$  | 0.05(4); 6.5(4)                      | -                                           | 0.99854 |
| Orbach+direct               | 20(2)              | $7(2) \times 10^{-6}$    | -                                    | 259(14)                                     | 0.98695 |
| Raman+direct                | -                  | -                        | 3(2); 4.1(3)                         | 220(15)                                     | 0.99362 |
| Orbach+Raman+direct         | 9.9(3)             | $7.7(5) \times 10^{-5}$  | $4(3) \times 10^{-5}$ ; 10.4(3)      | 190(3)                                      | 0.99993 |
| Orbach+Raman+direct*        | 8.8(3)             | $1.02(5) \times 10^{-5}$ | $4.7(1) \times 10^{-4}$ ; 9          | 178(5)                                      | 0.9998  |
| Orbach<br>for 5.0 K – 6.0 K | 26(2)              | $1.7(2) \times 10^{-6}$  | -                                    | -                                           | 0.97153 |

\*Raman exponent has been fixed to  $n=9$
